GLOBAL EPIDEMIOLOGY

# Salt intakes around the world: implications for public health

Ian J Brown,<sup>1</sup> Ioanna Tzoulaki,<sup>1</sup> Vanessa Candeias<sup>2</sup> and Paul Elliott<sup>1\*</sup>

**Accepted** 12 January 2009

**Background** High levels of dietary sodium (consumed as common salt, sodium chloride) are associated with raised blood pressure and adverse cardiovascular health. Despite this, public health efforts to reduce sodium consumption remain limited to a few countries. Comprehensive, contemporaneous sodium intake data from around the world are needed to inform national/international public health initiatives to reduce sodium consumption.

**Methods** Use of standardized 24-h sodium excretion estimates for adults from the international INTERSALT (1985–87) and INTERMAP (1996–99) studies, and recent dietary and urinary sodium data from observational or interventional studies—identified by a comprehensive search of peer-reviewed and ‘grey’ literature—presented separately for adults and children. Review of methods for the estimation of sodium intake/excretion. Main food sources of sodium are presented for several Asian, European and Northern American countries, including previously unpublished INTERMAP data.

**Results** Sodium intakes around the world are well in excess of physiological need (i.e. 10–20 mmol/day). Most adult populations have mean sodium intakes >100 mmol/day, and for many (particularly the Asian countries) mean intakes are >200 mmol/day. Possible exceptions include estimates from Cameroon, Ghana, Samoa, Spain, Taiwan, Tanzania, Uganda and Venezuela, though methodologies were sub-optimal and samples were not nationally representative. Sodium intakes were commonly >100 mmol/day in children over 5 years old, and increased with age. In European and Northern American countries, sodium intake is dominated by sodium added in manufactured foods (~75% of intake). Cereals and baked goods were the single largest contributor to dietary sodium intake in UK and US adults. In Japan and China, salt added at home (in cooking and at the table) and soy sauce were the largest sources.

**Conclusions** Unfavourably high sodium intakes remain prevalent around the world. Sources of dietary sodium vary largely worldwide. If policies

<sup>1</sup> Department of Epidemiology and Public Health, Faculty of Medicine, Imperial College London, UK.

<sup>2</sup> Chronic Diseases and Health Promotion Department, World Health Organisation, Geneva, Switzerland.

\* Corresponding author. Professor of Epidemiology and Public Health Medicine, Department of Epidemiology and Public Health, Faculty of Medicine, St Mary's Campus, Imperial College London, Norfolk Place, London W2 1PG, UK.  
E-mail: p.elliott@imperial.ac.uk

for salt reduction at the population level are to be effective, policy development and implementation needs to target the main source of dietary sodium in the various populations.

**Keywords** Salt, sodium, dietary, urinary, blood pressure, cardiovascular disease prevention

## Introduction

High levels of dietary sodium (consumed as common salt, sodium chloride) are associated with raised blood pressure (BP) and adverse cardiovascular health.<sup>1</sup> Animal experiments, epidemiological studies and clinical trials provide compelling evidence for a detrimental effect of sodium intake on BP among both hypertensive and normotensive individuals.<sup>2–8</sup> In addition to its effects on BP, excess dietary sodium consumption has been associated directly with coronary heart disease (CHD),<sup>9,10</sup> stroke<sup>11</sup> and non-cardiovascular diseases.<sup>12</sup>

Sodium intakes of different populations around the world were first brought to the attention of the research community by publication of Louis Dahl's famous graph in 1960, showing a positive linear relationship between prevalence of hypertension and mean sodium intake across five populations.<sup>13</sup> He noted that daily intakes of sodium varied considerably across population groups from 68 mmol/day among Alaskan Eskimos to 462 mmol/day in Akita prefecture, northeast Japan. American men had intermediate intakes averaging 171 mmol/day. He also noted a strong north–south trend in death rates from stroke in Japan, which coincided with differences in sodium intake ranging from 239 mmol/day in the south to 462 mmol/day in the northeast. The extremely high sodium intakes in the northeast reflected the dietary practice of eating rice with miso soup and pickles, and the use of soy sauce as seasoning.<sup>14</sup>

Dahl's observations on five populations were expanded by other authors.<sup>15,16</sup> Gleiberman<sup>15</sup> provided estimates of sodium intakes in 27 populations around the world, including both measured data and her own estimates. Froment *et al.*<sup>16</sup> used published data based mainly on 24-h urinary sodium excretion to compare sodium intakes from 28 populations. Reported salt intake varied from 1 mmol/day among the Yanomamo Indians of Brazil to 385 mmol/day in Korea and the Bahamas.<sup>17–19</sup> Nine isolated populations had salt intakes of <35 mmol/day. Subsequently, the INTERSALT Study provided standardized estimates of sodium intakes from 52 population samples in 32 countries based on data from 24-h urinary collections.<sup>8,20</sup>

Despite the wealth of evidence for unfavourable effects of salt consumption on BP and cardiovascular health, public health efforts to decrease sodium consumption have been limited to a few countries.<sup>21–24</sup> Individuals are often unaware of the

detrimental effect of salt on health<sup>25</sup> and in developed countries, the majority of salt consumed is hidden in processed foods.<sup>26,27</sup> The aims of the present report are: (i) to present a comprehensive overview of salt intakes around the world in both adults and children; (ii) estimate contemporary intake levels; and thus (iii) provide the basis for public health initiatives to reduce sodium intakes and the related burden of cardiovascular and other diseases.

## Methods

Sodium intake estimates include the extensive standardized population data on 24-h urinary sodium excretion from the INTERSALT Study,<sup>28</sup> and on sodium intakes and 24-h urinary sodium excretion from the subsequent International Study of Macro- and Micro-Nutrients and Blood Pressure (INTERMAP).<sup>29</sup> INTERSALT collected standardized data on 24-h urinary excretion of sodium among 10 079 men and women aged 20–59 years from 52 population samples in 32 countries—by far the most extensive set of standardized data on 24-h urinary sodium excretion patterns around the world.<sup>8,20</sup> Data collection took place between 1985 and 1987. To guard against under- and over-collection, both start and end times of the urine collections were supervised by clinic staff. Urine collections were rejected if the participant answered that 'more than a few drops' were missing from the collection, if urinary volumes were <250 ml, or if the timing of the collection fell outside the range 20–28 h. Eight percent of the study sample collected a second 24-h urinary specimen 3–6 weeks later to estimate within-individual variability of sodium excretion.

INTERMAP included measurements of dietary sodium intake and urinary sodium excretion from men and women, aged 40–59 years, from 17 population samples in Japan (four samples), People's Republic of China (PRC, three samples), UK (two samples) and USA (eight samples).<sup>29</sup> Data collection took place between 1996 and 1999. Each participant had two study visits on consecutive days, with two additional study visits on consecutive days 3–6 weeks later. Measurements included dietary intake based on four multiple-pass 24-h dietary recalls (one at each study visit).<sup>29,30</sup> All foods and beverages consumed in the previous 24-h, including dietary supplements, were recorded. Two timed 24-h urine samples, started

at the research centre (on the first and third study visits) and completed the next day, were obtained from each participant using the methods developed for INTERSALT.<sup>31</sup> Quality control was extensive, with local, national and international checks on the completeness and integrity of non-dietary and dietary information.<sup>29,30</sup> Individuals were excluded if (*inter alia*) diet data were considered unreliable, energy intake from any 24-h dietary recall was <2100 kJ/day or was >21 000 kJ/day for women or >33 600 kJ/day for men, or if two complete urine samples were not obtained.

We augment INTERSALT and INTERMAP data with reference here to the historical literature on sodium intakes and BP<sup>13–16,32</sup> and with data from peer-reviewed and ‘grey’ literature from 1988 to the present. Estimates of sodium intake in children and young adults were obtained from a literature search (see below), and from key reviews by Lambert *et al.*<sup>33</sup> and Simons-Morton and Obarzanek.<sup>34</sup> These summarize the available data on children’s intakes from national surveys and observational studies of sodium intake and BP, respectively.

### Search strategy

We carried out a search of the peer-reviewed literature on survey methods, sources of sodium in the diet and dietary surveys of sodium intake that have been published from 1988 onwards. Papers potentially to be included in our report were identified by: (i) a comprehensive keyword search of Medline and Thompson ISI Web of Science databases (keywords listed in Table S1 (Supplementary data are available at *Int J Epidemiol* online)) (ii) a Web of Science cited reference search identifying papers that have cited the INTERSALT Study; (iii) examination of resulting reference lists; and (iv) authors’ own knowledge and contacts. The search was essentially confined to the English literature, though non-English-language papers were included if identified by English keywords. Non-English-language grey literature was also considered.

Abstracts were reviewed and deemed ‘not relevant’, ‘of potential interest’ or ‘of definite interest’. Those deemed ‘not relevant’ were rejected on the grounds that they did not appear to include data on sodium intake; efforts were made to obtain full copies of the remaining publications for review. Inclusion criteria were: (i) community-based study; (ii) observational design, or interventional design with baseline data; and (iii) mean dietary sodium intake or urinary excretion rate (amount/time) reported. Nationally representative data were included where available. Where more than one method was used to measure sodium we report only one, in the following order of preference: (a) 24-h urine collection; (b) duplicate food portion, multi-day weighed dietary record or 24-h dietary recall; and (c) overnight or <24-h urine collection with urine volume reported. Data on sodium concentration or sodium/creatinine ratio

were excluded, as absolute excretion rates could not be calculated.<sup>35–39</sup>

### Units

Sodium intake is usually reported as either mass or millimolar amounts of sodium, or as mass of sodium chloride (salt). Here we refer mainly to dietary sodium and not to dietary salt (1 g sodium chloride = 17.1 mmol sodium). For ease of comparison all dietary and urinary estimates were converted to millimolar sodium per day (1 mmol sodium = 23 mg). Wherever possible, given estimates of variability were converted to standard deviations based on approximate normality of distributions.

### The measurement of dietary sodium intake

As noted, the studies included in this review use different methods to estimate sodium intake, falling into two broad categories: (i) estimates based on urinary sodium excretion; and (ii) estimates based on dietary survey—each with its own strengths and limitations.

#### *Estimates based on urinary sodium excretion*

Because of the problems of underestimation of sodium intakes based on dietary surveys in most studies, 24-h urinary sodium excretion has become the preferred method of obtaining data on sodium intakes in population surveys.<sup>40–42</sup> A 24-hour period is necessary to capture the marked diurnal variation in sodium, chloride and water excretion. Electrolyte excretion in healthy individuals reaches a maximum at or before midday, and a minimum at night towards the end of sleep.<sup>43</sup>

The 24-h urinary excretion method takes no account of electrolyte loss other than via the kidney, and therefore will tend to underestimate true intake. For example, among 28 adults average urinary excretion of sodium from seven consecutive 24-h urine collections was 86% of that estimated from chemical analysis of duplicate diets, collected over the same 7-day period.<sup>44</sup> Losses of sodium in the faeces are small;<sup>45,46</sup> losses through sweat are minimal in temperate climates but can be considerable in certain conditions.<sup>47</sup>

Unlike most dietary methods, the 24-h urine collection is not prone to reporting biases; however: (i) participant burden is high and therefore rates of attrition may be high; (ii) the collection must be complete, or near-complete, otherwise the excretion estimate will be biased; (iii) there is no absolute check on completeness [though the sodium/creatinine ratio and para-aminobenzoic acid (PABA) marker have been used—the latter mainly in validation studies];<sup>48–51</sup> and (iv) the collection must be accurately timed to avoid over- as well as under-collection and so that minor deviations from a 24-h collection period can be corrected. Data from studies with standardized methods, such as INTERSALT, INTERMAP



and national surveys, including the UK Diet and Nutrition Survey, demonstrate that sodium excretion estimates are reproducible at population level, though there is well-known marked intra-individual variability (reflecting day-to-day variation in a person's sodium intake) at individual level.<sup>52</sup>

Overnight urine collections are a low-burden alternative to 24-h collection as fewer voidings are required, and the participant does not have to continue the collection during daily activities. As a result, a higher rate of compliance is likely in large epidemiological surveys.<sup>53</sup> The collection begins once the participant has voided before bed (urine is discarded), and the time is recorded. All urine voided during the night, and the first void in the morning upon rising, constitute the overnight collection. Sodium excretion is calculated and corrected to an 8-h base.<sup>54</sup> Despite these advantages in terms of participant burden and compliance, overnight urine collections may be biased because of the marked diurnal variation in sodium excretion.<sup>43</sup> This varies between individuals depending on factors including sodium intake, gender and race, and in hypertensive individuals, usual diurnal pattern may be reversed, with a greater proportion of sodium load being excreted at night.<sup>54–57</sup>

#### *Estimates based on dietary survey*

Foods consumed by an individual over a set period are recorded and these data are converted into nutrient intakes via standardized food tables. This approach is vulnerable to reporting errors, inaccurate or incomplete food composition tables, coding errors and sampling bias.<sup>40</sup> Specific problems for estimating sodium intake include: quantifying accurately the amount of sodium chloride added during cooking (including at restaurants) and at the table; variation in the proportion of salt added during cooking that is retained by the food (i.e. salt left behind on the plate); and variation in the sodium content of manufactured foods and in the sodium concentration of local water supplies.<sup>26,40</sup> The sodium content of processed and restaurant foods is especially important, as these contribute three-quarters or more of the sodium intake of a typical western diet.<sup>26,27</sup> As a consequence of the above, sodium intake estimates based on the food diary, weighed records, food-frequency questionnaire or 24-h dietary recall tend to underestimate sodium intakes as compared with intakes estimated from duplicate diets or 24-h urine collections.<sup>49,58–61</sup> A notable exception is the INTERMAP study, where similar estimates of sodium intake were obtained from the average of four 24-h dietary recalls and two 24-h urine collections for participants in Japan, UK and USA (but not PRC, where 24-h dietary recall estimates were lower than urinary estimates).<sup>29</sup>

## Results

### INTERSALT study

Among the 52 population samples included in INTERSALT, lowest mean values of sodium excretion were found among the Yanomamo Indians of Brazil: 0.8 mmol/day in men and 1.0 mmol/day in women (see Appendix Tables in *J Hum Hypertens* INTERSALT Special Issue).<sup>28</sup> Three other remote population groups had mean 24-h urinary sodium excretion of ~50 mmol/day or below: Xingu Indians of Brazil, Papua New Guinea Highlanders and the Luo in rural Kenya. Highest mean urinary sodium excretion was recorded in Tianjin, PRC: 259 mmol/day in men and 233 mmol/day in women. Urinary sodium excretion in Nanning in southern China was lower than in the other two Chinese samples: 177 mmol/day in men and 161 mmol/day in women. The highest mean urinary sodium excretion in Japan was found in Toyama: 224 mmol/day in men and 201 mmol/day in women. Mean values >200 mmol/day in men were also found in Canada, Columbia, Hungary, Ladakh (India), Bassiano (Italy), Poland, Portugal and South Korea. Men had higher values of urinary sodium excretion than women: modal value was 150–199 mmol/day for men and 100–149 mmol/day for women.

### INTERMAP study

Country- and gender-specific mean urinary sodium excretion data for INTERMAP participants are shown in Table 1; detailed tables of mean urinary excretion and dietary intake by age and population sample are available in *J Hum Hypertens* INTERMAP Special Issue.<sup>29</sup> As in INTERSALT, the highest mean values of urinary sodium excretion were found in PRC, ranging up to 299 mmol/day in men and 253 mmol/day in women in the Beijing sample, northern China. Again, mean urinary sodium excretion in southern China (Guangxi) was much lower: 150 mmol/day in men and 128 mmol/day in women. In the USA, mean 24-h urinary sodium excretion for the eight population samples were all in the range 180–190 mmol/day for men and ~130–150 mmol/day for women. For the four Japanese samples, mean 24-h urinary sodium excretion was in the range of 195–220 mmol/day in men and ~160–200 mmol/day in women. Average 24-h urinary excretion values for sodium in the two UK samples were 161 mmol/day in men and 127 mmol/day in women.

Figure S1 (Supplementary data are available at *Int J Epidemiol* online) shows the within-population sample distributions of 24-h urinary sodium excretion for men and women among each of the four countries in INTERMAP (with north and south China displayed separately). The vast majority of people in each of the countries had urinary sodium excretion of >100 mmol/day, and few had values <70 mmol/day. Note that because of the large day-to-day variability in urinary sodium excretion, especially among the

**Table 1** Mean dietary intake or urinary excretion of sodium for adults from around the world: 1988–present

| Country (survey year)            | References                                                 | Sampling                                                                                                                                                          | Age range    | Measurement                       | Sample size                                                                  | Mean sodium $\pm$ SD, mmol/day                                   | Notes                                                                                                                                                                |
|----------------------------------|------------------------------------------------------------|-------------------------------------------------------------------------------------------------------------------------------------------------------------------|--------------|-----------------------------------|------------------------------------------------------------------------------|------------------------------------------------------------------|----------------------------------------------------------------------------------------------------------------------------------------------------------------------|
| American/Western Samoa (1990–91) | Galanis <i>et al.</i> <sup>63</sup>                        | Individuals recruited from 46 villages and worksites in American Samoa, and nine villages in Western Samoa. Samoans with European or Asian ancestry were excluded | 25–55 yr     | Single 24-h dietary recall        | 455 American Samoans<br>491 Western Samoans                                  | 94.9 $\pm$ 66.1 <sup>a</sup><br>76.7 $\pm$ 61.0 <sup>a</sup>     | Approximately equal number of men and women                                                                                                                          |
| Australia (1995)                 | Beard <i>et al.</i> <sup>125</sup>                         | Systematic sample from the Hobart electoral role                                                                                                                  | 18–70 yr     | Single 24-h urine collection      | 87 men<br>107 women                                                          | 170.0 $\pm$ 52.0<br>118.0 $\pm$ 42.0                             |                                                                                                                                                                      |
| Barbados (1991–94)               | Cooper <i>et al.</i> <sup>64</sup>                         | Random sample of general population from periurban areas including Bridgetown                                                                                     | $\geq 25$ yr | Single 24-h urine collection      | 813 men and women                                                            | 115.3 $\pm$ 53.5                                                 | Urinary sodium assessed for an unspecified subset of total population                                                                                                |
| Brazil (1990–92)                 | Moraes <i>et al.</i> <sup>126</sup>                        | Random sample of the general population from the city of Porto Alegre                                                                                             | 18–35 yr     | Single overnight urine collection | Family history of hypertension: 27<br>No family history of hypertension: 130 | 136.4 $\pm$ 64.8 <sup>b</sup><br>135.0 $\pm$ 73.2 <sup>b</sup>   |                                                                                                                                                                      |
| Brazil (n/a)                     | Pavan <i>et al.</i> <sup>68</sup>                          | Non-random general population sample of Amazonian Rondonia district, stratified by age and sex                                                                    | 22–89 yr     | Unspecified dietary method        | 370 men and women                                                            | 171.2 $\pm$ n/a                                                  |                                                                                                                                                                      |
| Brazil (1999–2004)               | Bisi Molina <i>et al.</i> <sup>127</sup>                   | Random sample of inhabitants from the city of Vitoria                                                                                                             | 25–64 yr     | Single overnight urine collection | 764 men<br>899 women                                                         | 214.0 $\pm$ 116.0 <sup>b</sup><br>186.0 $\pm$ 114.0 <sup>b</sup> |                                                                                                                                                                      |
| Cameroon (1991–94)               | Cooper <i>et al.</i> <sup>64</sup>                         | Random sample of civil servants from Yaounde and rural villages from the same region                                                                              | $\geq 25$ yr | Single 24-h urine collection      | Urban: 1361<br>Rural: 1467                                                   | 54.3 $\pm$ 30.2<br>88.4 $\pm$ 47.7                               | Urinary sodium assessed for an unspecified subset of total population                                                                                                |
| Canada (1990–99)                 | Institute of Medicine, <sup>105</sup> citing Health Canada | Unspecified sample from 10 provinces                                                                                                                              | $\geq 19$ yr | Unspecified dietary method        | 18 214 men and women                                                         | 135.7 $\pm$ 234.7                                                |                                                                                                                                                                      |
| France (n/a)                     | du Cailar <i>et al.</i> <sup>128</sup>                     | Individuals attending outpatient clinic in Montpellier for detection of CVD risk factors                                                                          | 14–70 yr     | Two 24-h urine collections        | 14–40 yr: 438<br>41–70 yr: 417                                               | 144.0 $\pm$ 54.0<br>147.0 $\pm$ 62.0                             | Approximately equal number of men and women<br>Those with heart disease, atherosclerosis, diabetes, renal disease, severe obesity, history of alcohol abuse excluded |

(continued)

Table 1 Continued

| Country (survey year) | References                              | Sampling                                                                                                                 | Age range    | Measurement                                                               | Sample size                                                                                                                                                                | Mean sodium $\pm$ SD, mmol/day                                                                                                                                                                     | Notes                                                                                                      |
|-----------------------|-----------------------------------------|--------------------------------------------------------------------------------------------------------------------------|--------------|---------------------------------------------------------------------------|----------------------------------------------------------------------------------------------------------------------------------------------------------------------------|----------------------------------------------------------------------------------------------------------------------------------------------------------------------------------------------------|------------------------------------------------------------------------------------------------------------|
| Finland (2002)        | Laatikainen <i>et al.</i> <sup>24</sup> | Random sample stratified by age and sex from population lists of three areas                                             | 25–64 yr     | Single 24-h urine collection                                              | 168 men (North Karelia)<br>128 men (South-western Finland)<br>127 men (Helsinki)<br>174 women (North Karelia)<br>156 women (South-western Finland)<br>156 women (Helsinki) | 163.2 $\pm$ 65.5 <sup>c</sup><br>169.6 $\pm$ 75.6 <sup>c</sup><br>147.8 $\pm$ 92.0 <sup>c</sup><br>127.8 $\pm$ 48.5 <sup>c</sup><br>127.1 $\pm$ 49.7 <sup>c</sup><br>119.1 $\pm$ 52.9 <sup>c</sup> | Villages were rural or semi-urban                                                                          |
| Ghana (2001–02)       | Cappuccio <i>et al.</i> <sup>65</sup>   | Age-sex stratified random sample of general population from 12 villages from the Ashanti region                          | 40–75 yr     | Two 24-h urine collections at baseline                                    | Intervention: 522<br>Control: 491                                                                                                                                          | 99.9 $\pm$ 44.7<br>102.5 $\pm$ 45.3                                                                                                                                                                |                                                                                                            |
| Iran (1998)           | Azizi <i>et al.</i> <sup>35</sup>       | Random sample of households from two cities: Rasht and Sari                                                              | >2 yr        | FFQ and 2 weeks weighed discretionary salt                                | Rasht: 340<br>Sari: 343                                                                                                                                                    | 127.6 $\pm$ 80.4<br>131.8 $\pm$ 68.5                                                                                                                                                               |                                                                                                            |
| Italy (n/a)           | Pavan <i>et al.</i> <sup>68</sup>       | Non-random general population sample from the towns of Mirano and Castelfranco Veneto, stratified by age and sex         | 22–89 yr     | Unspecified dietary method                                                | 370 men and women                                                                                                                                                          | 188.3 $\pm$ n/a                                                                                                                                                                                    |                                                                                                            |
| Jamaica (1994–95)     | Cooper <i>et al.</i> <sup>64</sup>      | Random sample of general population from periurban areas including Spanish Town                                          | $\geq$ 25 yr | Single 24-h urine collection                                              | 1257 men and women                                                                                                                                                         | 143.6 $\pm$ 112.6                                                                                                                                                                                  | Urinary sodium assessed for an unspecified subset of total population                                      |
| Japan (1985–99)       | Liu <i>et al.</i> <sup>129</sup>        | Random population samples from eight locations throughout Japan                                                          | 48–56 yr     | Single 24-h urine collection                                              | 484 men<br>542 women                                                                                                                                                       | 221.2 $\pm$ 92.4<br>194.5 $\pm$ 72.2                                                                                                                                                               | Individuals with incomplete urine collections, or prescribed drug treatment for hypertension were excluded |
| Japan (1993–94)       | Kawamura <i>et al.</i> <sup>130</sup>   | Non-random sample of healthy long-term residents of the Morioka Iwate area                                               | 30–65 yr     | Single 24-h urine collection                                              | 132 men<br>70 women                                                                                                                                                        | 231 $\pm$ 78<br>189 $\pm$ 78                                                                                                                                                                       | Known to be an area of high salt consumption                                                               |
| Japan (1996–98)       | Stamler <i>et al.</i> <sup>29</sup>     | Age-sex stratified random samples from three urban occupational populations and one semi-rural community, INTERMAP Study | 40–59 yr     | Two 24-h urine collections with an average of 3 weeks between collections | 574 men<br>571 women                                                                                                                                                       | 210.5 $\pm$ 56.6<br>186.0 $\pm$ 53.1                                                                                                                                                               |                                                                                                            |
| Netherlands (n/a)     | Geleijnse <i>et al.</i> <sup>131</sup>  | Non-random sample. All age-eligible residents of a suburb of Rotterdam were invited to participate                       | >55 yr       | Single overnight urine collection                                         | 1006 men and women:<br>Men<br>Women                                                                                                                                        | 137.0 $\pm$ 66.0<br>103.0 $\pm$ 50.0                                                                                                                                                               |                                                                                                            |

(continued)

Table 1 Continued

| Country (survey year)                  | References                             | Sampling                                                                                                                                                               | Age range    | Measurement                                                               | Sample size                                                                      | Mean sodium $\pm$ SD, mmol/day                                                  | Notes                                                                                                                                                                          |
|----------------------------------------|----------------------------------------|------------------------------------------------------------------------------------------------------------------------------------------------------------------------|--------------|---------------------------------------------------------------------------|----------------------------------------------------------------------------------|---------------------------------------------------------------------------------|--------------------------------------------------------------------------------------------------------------------------------------------------------------------------------|
| Nigeria (1991–94)                      | Cooper <i>et al.</i> <sup>64</sup>     | Random sample of the general population in rural and urban areas                                                                                                       | $\geq 25$ yr | Single 24-h urine collection                                              | 2509 men and women                                                               | 121.5 $\pm$ 76.1                                                                | Urinary sodium assessed for an unspecified subset of total population                                                                                                          |
| Nigeria (1994)                         | Kaufman <i>et al.</i> <sup>132</sup>   | Random recruitment of 'rural farmers' and 'urban poor' who had participated in an earlier study, and of age-eligible members of the Nigerian Railway Pensioners' Union | >45 yr       | Single 24-h urine collection                                              | 144 men<br>178 women                                                             | 111.6 $\pm$ 53.6<br>108.8 $\pm$ 60.0                                            |                                                                                                                                                                                |
| Panama (n/a)                           | Hollenberg <i>et al.</i> <sup>39</sup> | Non-random samples of Kuna Indians from the isolated San Blas Islands. All participants were from the same nine families                                               | 18–82 yr     | Single 24-h dietary recall                                                | 50 men and women                                                                 | 210.0 $\pm$ 155.6                                                               |                                                                                                                                                                                |
| People's Republic of China (1985–99)   | Liu <i>et al.</i> <sup>133</sup>       | Random population samples from 11 locations throughout China                                                                                                           | 48–56 yr     | Single 24-h urine collection                                              | 572 men<br>563 women                                                             | 205.1 $\pm$ 84.8<br>175.4 $\pm$ 83.9                                            |                                                                                                                                                                                |
| People's Republic of China (1985–2000) | Liu <i>et al.</i> <sup>70</sup>        | Random samples of men and women from Han, Uygur, Kazak and Tibetan ethnic populations                                                                                  | 48–56 yr     | Single 24-h urine collection                                              | 775 Han<br>510 Uygur<br>204 Kazaks<br>125 Tibetans                               | 193.0 $\pm$ 97.4<br>173.5 $\pm$ 135.5<br>213.1 $\pm$ 137.1<br>253.7 $\pm$ 114.0 | Approximately even number of men and women<br>Individuals with incomplete urine collections, or prescribed drug treatment for hypertension were excluded (included in given n) |
| People's Republic of China (1992)      | Nan <i>et al.</i> <sup>71</sup>        | Random sample of the general population from an urban area of Tianjin                                                                                                  | 15–64 yr     | 3-day weighed food record                                                 | 1133 men<br>1184 women                                                           | 283.3 $\pm$ 109.7<br>248.2 $\pm$ 96.6                                           |                                                                                                                                                                                |
| People's Republic of China (1995–96)   | Woo <i>et al.</i> <sup>134</sup>       | Age-sex stratified random sample of the Hong Kong Chinese population                                                                                                   | 25–74 yr     | 266-item FFQ                                                              | 500 men<br>510 women                                                             | 210.5 $\pm$ n/a<br>196.4 $\pm$ n/a                                              | Individuals with incomplete urine collections, prescribed drug treatment for hypertension excluded                                                                             |
| People's Republic of China (1997–98)   | Stamler <i>et al.</i> <sup>29</sup>    | Age-sex stratified random samples from three rural communities (two northern and one southern China), INTERMAP Study                                                   | 40–59 yr     | Two 24-h urine collections with an average of 3 weeks between collections | 276 northern men<br>285 northern women<br>140 southern men<br>138 southern women | 293.2 $\pm$ 91.8<br>250.2 $\pm$ 77.3<br>149.7 $\pm$ 58.9<br>128.1 $\pm$ 52.9    |                                                                                                                                                                                |
| South Africa (n/a)                     | Charlton <i>et al.</i> <sup>135</sup>  | Individuals recruited from Cape Town City Council                                                                                                                      | 20–65 yr     | Three 24-h urine collections over a 3-week period                         | 110 black<br>112 mixed ancestry<br>103 white                                     | 135.3 $\pm$ 50.1<br>147.5 $\pm$ 73.5<br>164.8 $\pm$ 91.0                        | Approximately even number of men and women                                                                                                                                     |
| Spain (1994–96)                        | Schroder <i>et al.</i> <sup>66</sup>   | Random sample of Gerona province population, stratified by age and sex                                                                                                 | 25–74 yr     | 72-h dietary recall                                                       | 986 normotensive<br>371 non-medicated hypertensive<br>210 medicated hypertensive | 93.1 $\pm$ n/a<br>96.3 $\pm$ n/a<br>91.9 $\pm$ n/a                              | Means are age, sex, energy adjusted                                                                                                                                            |

(continued)

Table 1 Continued

| Country (survey year)     | References                                       | Sampling                                                                                                                 | Age range                      | Measurement                                                               | Sample size                         | Mean sodium $\pm$ SD, mmol/day         | Notes                                                                 |
|---------------------------|--------------------------------------------------|--------------------------------------------------------------------------------------------------------------------------|--------------------------------|---------------------------------------------------------------------------|-------------------------------------|----------------------------------------|-----------------------------------------------------------------------|
| St. Lucia (1991–94)       | Cooper <i>et al.</i> <sup>64</sup>               | Random sample of general population from periurban areas, including Vieux Fort                                           | $\geq 25$ yr                   | Single 24-h urine collection                                              | 1089 men and women                  | 145.9 $\pm$ 62.5                       | Urinary sodium assessed for an unspecified subset of total population |
| Taiwan (1990)             | Liu and Chung <sup>67</sup>                      | Non-random sample of students, faculty and staff of the National Tsing Hua University                                    | n/a                            | Chemical analysis of 3-day duplicate food portions                        | 8 men<br>7 women                    | 109.6 $\pm$ 113.0<br>98.3 $\pm$ 52.2   |                                                                       |
| Tanzania and Uganda (n/a) | Pavan <i>et al.</i> <sup>68</sup>                | Non-random general population sample of Lugarawa and Lugbara districts, stratified by age and sex                        | 22–89 yr                       | Unspecified dietary method                                                | 370 men and women                   | 68.5 $\pm$ n/a                         |                                                                       |
| UK (1993–97)              | Khaw <i>et al.</i> <sup>61</sup>                 | Non-random sub-sample of the EPIC-Norfolk cohort                                                                         | 45–79 yr                       | Six 24-h urine collections over one year                                  | 159 men<br>181 women                | 161.0 $\pm$ 64.0<br>125.0 $\pm$ 42.0   |                                                                       |
| UK (1997–99)              | Stamler <i>et al.</i> <sup>29</sup>              | Age-sex stratified random samples from two areas, a combination of occupational and community sampling, INTERMAP Study   | 40–59 yr                       | Two 24-h urine collections with an average of 3 weeks between collections | 266 men<br>235 women                | 160.9 $\pm$ 51.3<br>127.4 $\pm$ 39.7   |                                                                       |
| UK (2000–01)              | Henderson <i>et al.</i> <sup>136</sup>           | Nationally representative sample, NDNS                                                                                   | 19–64 yr                       | Single 24-h urine collection                                              | 567 men<br>580 women                | 187.4 $\pm$ 85.8<br>138.5 $\pm$ 66.4   |                                                                       |
| UK (2005–06)              | National Centre for Social Research <sup>7</sup> | Nationally representative sample                                                                                         | 19–64 yr                       | Single 24-h urine collection with PABA tablets                            | 294 men<br>398 women                | 166 $\pm$ 70<br>131 $\pm$ 50           |                                                                       |
| USA (1996–98)             | Stamler <i>et al.</i> <sup>29</sup>              | Age-sex stratified random samples from eight areas, a combination of occupational and community sampling, INTERMAP Study | 40–59 yr                       | Two 24-h urine collections with an average of 3 weeks between collections | 1103 men<br>1092 women              | 182.7 $\pm$ 62.4<br>142.3 $\pm$ 48.3   |                                                                       |
| USA (1999–2000)           | Wright <i>et al.</i> <sup>137</sup>              | Nationally representative sample (excluding nursing infants), NHANES 1999–2000                                           | All ages (children and adults) | Single 24-h dietary recall                                                | 4206 males<br>4398 females          | 168.6 $\pm$ 170.6<br>125.9 $\pm$ 115.0 |                                                                       |
| Venezuela (n/a)           | Negretti de Bratter <i>et al.</i> <sup>69</sup>  | Individuals recruited for a case-control study in high- and low-altitude areas of the state of Tachira                   | n/a                            | Chemical analysis of one day duplicate food portions                      | 77 high altitude<br>33 low altitude | 90.5 $\pm$ n/a<br>64.0 $\pm$ n/a       |                                                                       |

<sup>a</sup>Converted to mmol/day by: sodium (mg/1000 kcal)  $\times$  [energy intake (kcal)]/(1000).<sup>b</sup>Converted to mmol/day by: [sodium (mmol)/12 h]  $\times$  24 h.<sup>c</sup>Standard deviation estimated by: [(Upper 95% confidence interval – mean)/1.96]  $\times$   $\sqrt{\text{sample size}}$ .

Sodium: 1 mmol = 23 mg.

EPIC, European Prospective Investigation into Cancer and Nutrition; FFQ, Food Frequency Questionnaire; INTERMAP, International Study of Macro- and Micro-Nutrients and Blood Pressure; n/a, not available; NDNS, National Diet and Nutrition Survey; NHANES, National Health and Nutrition Examination Survey; PABA, para-aminobenzoic acid; SD, standard deviation; yr, years.



western countries, the standard deviation of urinary sodium is inflated so that even fewer people had 'true' (average, long-term) urinary sodium excretion below these values.<sup>62</sup>

### Other studies published since 1988

Table 1 lists studies published since 1988, giving data on sodium intake or urinary excretion from different countries around the world. It includes 28 reports from 25 countries on six continents. Intakes of <100 mmol/day were reported in American and Western Samoa,<sup>63</sup> Cameroon,<sup>64</sup> Ghana,<sup>65</sup> Spain,<sup>66</sup> Taiwan,<sup>67</sup> Tanzania and Uganda<sup>68</sup> and Venezuela,<sup>69</sup> but these reports were based on a variety of methods including dietary recall, unspecified questionnaire and duplicate diets, and only two relied on 24-h urine collections<sup>64,65</sup>—the validity of the other estimates is therefore open to question. Studies in PRC gave sodium intake estimates ranging from 174 mmol/day for men and women from an ethnic Uyghur population<sup>70</sup> to 254 mmol/day in men from urban Tianjin.<sup>71</sup> Across all countries, in all studies with gender-specific data, mean sodium intakes in men were higher than in women, largely reflecting differences in total food consumption.

### Time trends

As a result of public health campaigns in Japan to lower sodium intake,<sup>21</sup> the very high sodium intakes recorded in northern Japan in the 1950s and early 1960s were not observed in the INTERSALT<sup>8</sup> and INTERMAP studies, nor other recent surveys (Table 1). Data from the Japanese National Nutrition Survey show a fall in mean daily sodium intake from 248 mmol/day in 1973 to 200 mmol/day in 1987. Since 1987 sodium intakes in Japan appear to have levelled off or even risen, though changes in survey technique and in total energy intake complicate interpretation of the later data.<sup>72</sup> Prospective INTERSALT data are consistent with the levelling off observed in the National Nutrition Survey in Japan: among INTERSALT participants examined in 1985 and followed up 8 years later in 1993, sodium excretion was hardly changed, except in Toyama, where a small decrease was noted (significant only in women aged 20–39 years).<sup>73</sup>

In Belgium, where the amount of sodium in bread was reduced from the mid-1960s to the early 1980s,<sup>22</sup> mean daily sodium excretion has declined over the same period: from 265 to 188 mmol/day in men ages ≥65 years, and from 208 to 160 mmol/day in women ages ≥60 years.<sup>74</sup> In Finland—subject to a concerted public health effort to reduce cardiovascular disease (CVD) risk—marked reductions in sodium excretion were documented from 1979 to 2002: annual decrease in men of 2.4 mmol/day, in women 1.9 mmol/day (both  $P < 0.001$ ).

In the UK, there was a small increase in mean 24-h urinary sodium excretion between national surveys conducted in 1986 and 2000 (from 173 to 187 mmol/day in men,  $P < 0.05$ ; from 132 to 138 mmol/day in

women,  $P$  non-significant);<sup>75</sup> while nationally representative data collected in 2005 indicate a reduction of sodium intakes in both men and women to 166 and 131 mmol/day, respectively.<sup>76</sup>

In the USA, the NHANES national surveys reported successively higher sodium intakes in consecutive surveys from 1971 to 1994, while the Continuing Survey of Food Intakes by Individuals (CSFII) reported unchanged or higher sodium intakes from 1985 to 1996. It is not clear to what extent these increases might reflect methodological changes in the surveys.<sup>77</sup> Four market-research panel surveys of USA adults conducted between 1980 and 1992, based on 14-day food diaries, recorded little change in mean sodium intake.<sup>25</sup>

### Sodium intakes in children and adolescents

Fewer data are available on sodium intake in children and young people than in adults, and these are mainly limited to the developed nations of Europe and North America.<sup>33,34</sup> We focus here on observational and interventional studies identified by systematic literature review, and on recent reviews of observational studies of diet and BP in children<sup>34</sup> and of dietary surveys among European children,<sup>33</sup> comprising in total 41 reports from 20 countries on four continents (Table 2).

Highest mean dietary sodium intake was reported for Danish boys (14–19 years), mean intake 191 mmol/day,<sup>78</sup> and Chinese boys and girls (12–16 years) from rural Shanxi, mean intake 174.4 mmol/day.<sup>79</sup> Dietary intake was >140 mmol/day among boys from Belgium, Hungary, Netherlands, Spain, USA<sup>80–84</sup> and black boys and girls from Chicago and Tennessee, USA.<sup>84,85</sup>

Among children ≤5 years old, sodium intake was consistently <100 mmol/day, ranging from 72 mmol/day in British children aged 4 months<sup>86</sup> to 88.9 mmol/day in American children aged 3–5 years.<sup>87</sup> Intakes <100 mmol/day were also reported in some older children, including boys aged 8–9 years from Belgium, Bulgaria, Finland, Netherlands and Sweden,<sup>81</sup> Polish boys (but not girls) aged 9–11 years;<sup>88</sup> Dutch boys and girls aged 15 years;<sup>89</sup> Greek girls aged 13–14 years;<sup>90</sup> Swedish girls aged 14–17 years;<sup>91,92</sup> and American girls aged 11–19 years.<sup>93,94</sup> When interpreting these apparently favourable intakes, the potential for under-estimation of sodium intake by both dietary and urinary survey methods—particularly problematic in children—needs to be considered.

Where comparable data were available, sodium intake tended to be higher among boys than girls by ~20 mmol/day on average. Reports from Italy and Poland were exceptions: mean intakes were higher among girls than boys by ~4 and 30 mmol/day, respectively.<sup>88,95</sup> Mean sodium intake appeared to increase with age. Based on all dietary and urinary data included in Table 2, regression of mean sodium on age indicated sodium intake higher by ~4.3 mmol/day per year of age. Observed trends by age and sex

**Table 2** Mean dietary intake or urinary excretion of sodium for children and adolescents from around the world: 1968–present

| Country (survey year) | References                                              | Sampling                                                                                                            | Age range | Measurement                                                            | Sample size                                                               | Mean sodium $\pm$ SD, mmol/day                                                                                  | Notes |
|-----------------------|---------------------------------------------------------|---------------------------------------------------------------------------------------------------------------------|-----------|------------------------------------------------------------------------|---------------------------------------------------------------------------|-----------------------------------------------------------------------------------------------------------------|-------|
| Australia (1985)      | Jenner <i>et al.</i> <sup>138</sup>                     | Representative random sample of Perth school children                                                               | 9 yr      | 160-item FFQ                                                           | 434 boys<br>450 girls                                                     | 114.8 $\pm$ 30.9<br>104.8 $\pm$ 30.9                                                                            |       |
| Austria (1986)        | Knuiman <i>et al.</i> <sup>81</sup>                     | Random sample of boys from selected schools in Vienna                                                               | 8–9 yr    | Single 24-h urine collection                                           | 43 boys                                                                   | 106.0 $\pm$ 41.3                                                                                                |       |
| Belgium (1979–81)     | Staessen <i>et al.</i> <sup>80</sup>                    | Random population sample from two towns                                                                             | 10–19 yr  | Single 24-h urine collection                                           | 82 boys<br>78 girls                                                       | 142.0 $\pm$ 64.0<br>129.0 $\pm$ 48.0                                                                            |       |
| Belgium (1986)        | Knuiman <i>et al.</i> <sup>81</sup>                     | Random sample of boys from selected schools in Ghent                                                                | 8–9 yr    | Single 24-h urine collection                                           | 38 boys                                                                   | 92.0 $\pm$ 38.2                                                                                                 |       |
| Bulgaria (1986)       | Knuiman <i>et al.</i> <sup>81</sup>                     | Random sample of boys from selected schools in Sofia                                                                | 8–9 yr    | Single 24-h urine collection                                           | 58 boys                                                                   | 93.0 $\pm$ 32.8                                                                                                 |       |
| Denmark (1995)        | Lyhne <sup>78,a</sup>                                   | National                                                                                                            | 14–19 yr  | 7-day diet diary                                                       | 116 boys<br>129 girls                                                     | 191.3 $\pm$ 69.6<br>134.8 $\pm$ 43.5                                                                            |       |
| Denmark (1997–98)     | Hoppe <i>et al.</i> <sup>139</sup>                      | Random sample of children born at a hospital in Hvidovre                                                            | 10 yr     | 7-day diet diary                                                       | 51 boys<br>54 girls                                                       | 154.9 $\pm$ 41.6<br>128.7 $\pm$ 34.3                                                                            |       |
| Finland (1986)        | Knuiman <i>et al.</i> <sup>81</sup>                     | Random sample of boys from selected schools in Turku                                                                | 8–9 yr    | Single 24-h urine collection                                           | 48 boys                                                                   | 94.0 $\pm$ 36.0                                                                                                 |       |
| Finland (1990–97)     | Hcino <i>et al.</i> <sup>140</sup>                      | Non-random sample of boys and girls recruited from well-baby clinics in Turku                                       | 1–5 yr    | 3-day weighed food record at 13 mo, 4-day weighed record at 3 and 5 yr | 100 boys:<br>13 mo<br>3 yr<br>5 yr<br>100 girls:<br>13 mo<br>3 yr<br>5 yr | 70.0 $\pm$ 23.4<br>84.4 $\pm$ 23.4<br>100.0 $\pm$ 24.2<br>68.3 $\pm$ 22.5<br>82.6 $\pm$ 20.3<br>94.0 $\pm$ 21.6 |       |
| Finland (1997–98)     | Rasanen <i>et al.</i> <sup>141</sup>                    | Non-random sample of children from the control group of the Special Turku Coronary Risk Factor Intervention Project | 7 yr      | 4-day weighed food record                                              | 40 boys and<br>30 girls                                                   | 106.1 $\pm$ 21.7                                                                                                |       |
| Germany (1986)        | Knuiman <i>et al.</i> <sup>81</sup>                     | Random sample of boys from selected schools in three areas                                                          | 8–9 yr    | Single 24-h urine collection                                           | Berlin: 44 boys<br>Freiburg: 46 boys<br>Heidelberg: 40 boys               | 103.0 $\pm$ 63.0<br>127.0 $\pm$ 54.9<br>106.0 $\pm$ 36.0                                                        |       |
| Germany (1998)        | Deutsche Gesellschaft für Ernährung eV <sup>142,a</sup> | National                                                                                                            | 14–19 yr  | 1-day weighed record and diet history                                  | 38 924 boys and<br>girls                                                  | 139.1 $\pm$ n/a                                                                                                 |       |
| Germany (1996–2003)   | Remer <i>et al.</i> <sup>143</sup>                      | Non-random sample of children participating in the DONALD study                                                     | 6–12 yr   | Single 24-h urine collection                                           | 178 boys<br>180 girls                                                     | 136.0 $\pm$ 51.3<br>117.3 $\pm$ 46.9                                                                            |       |

(continued)

Table 2 Continued

| Country (survey year)             | References                               | Sampling                                                                                                                            | Age range | Measurement                              | Sample size                                                                 | Mean sodium $\pm$ SD, mmol/day                           | Notes                                      |
|-----------------------------------|------------------------------------------|-------------------------------------------------------------------------------------------------------------------------------------|-----------|------------------------------------------|-----------------------------------------------------------------------------|----------------------------------------------------------|--------------------------------------------|
| Greece (1986)                     | Knuiman <i>et al.</i> <sup>81</sup>      | Random sample of boys from selected schools in Athens                                                                               | 8–9 yr    | Single 24-h urine collection             | 50 boys                                                                     | 112.0 $\pm$ 43.1                                         |                                            |
| Greece (1987–88)                  | Hassapidou <i>et al.</i> <sup>90,a</sup> | Local                                                                                                                               | 13–14 yr  | 3-day weighed record                     | 20 boys and girls: Boys Girls                                               | 105.9 $\pm$ 42.7<br>78.1 $\pm$ 36.8                      |                                            |
| Hungary (1986)                    | Knuiman <i>et al.</i> <sup>81</sup>      | Two random sample of boys from selected schools in Budapest                                                                         | 8–9 yr    | Single 24-h urine collection             | 46 boys<br>27 boys                                                          | 146.0 $\pm$ 57.0<br>138.0 $\pm$ 40.0                     |                                            |
| India (n/a)                       | Joshi <i>et al.</i> <sup>144</sup>       | Non-random sample of children recruited from families attending a hospital in Mumbai                                                | 2–18 yr   | Single 24-h urine collection             | Family history of hypertension: 90<br>No family history of hypertension: 25 | 99.9 $\pm$ 23.4<br>86.7 $\pm$ 27.0                       | Groups were age-matched                    |
| Italy (1986)                      | Knuiman <i>et al.</i> <sup>81</sup>      | Random sample of boys from selected schools in three areas                                                                          | 8–9 yr    | Single 24-h urine collection             | Catania: 45 boys<br>Milan: 48 boys<br>Rome: 45 boys                         | 131.0 $\pm$ 48.3<br>115.0 $\pm$ 40.2<br>114.0 $\pm$ 40.2 |                                            |
| Italy (1988)                      | Agostoni <i>et al.</i> <sup>95,a</sup>   | Sample of boys and girls from the town of Corsico                                                                                   | 11 yr     | Single 24-h dietary recall               | 55 boys<br>65 girls                                                         | 138.0 $\pm$ 35.0<br>142.0 $\pm$ 46.0                     |                                            |
| Japan (n/a)                       | Yamauchi <i>et al.</i> <sup>145</sup>    | Non-random sample from city of Nagoya                                                                                               | 6–11 yr   | 7-day diet diary                         | 169 boys and 153 girls                                                      | 128.4 $\pm$ 45.7                                         |                                            |
| Netherlands (1975–78)             | Geleijnse <i>et al.</i> <sup>82</sup>    | Random sub-sample of population study of a suburban town in western Netherlands                                                     | 5–17 yr   | more then 6 overnight urine collections  | 108 boys<br>125 girls                                                       | 140.8 $\pm$ n/a<br>131.1 $\pm$ n/a                       |                                            |
| Netherlands (1986)                | Knuiman <i>et al.</i> <sup>81</sup>      | Random sample of boys from selected schools in Wageningen                                                                           | 8–9 yr    | Single 24-h urine collection             | 43 boys                                                                     | 91.0 $\pm$ 32.8                                          |                                            |
| Netherlands (1995)                | Geleijnse <i>et al.</i> <sup>89</sup>    | Non-random sample of children born to mothers in Zoetermeer in 1980, assigned to either normal or low sodium diet at birth for 6 mo | 15 yr     | Single overnight urine collection        | Normal diet: 48 boys and 48 girls<br>Low sodium diet: 38 boys and 33 girls  | 85.0 $\pm$ 46.0<br>75.0 $\pm$ 31.0                       |                                            |
| Netherlands (1993–2005)           | Schreuder <i>et al.</i> <sup>146</sup>   | Non-random sample of children attending a medical centre in Amsterdam                                                               | 5–10 yr   | Single 24-h urine collection             | 1993–95: 45 children<br>2003–05: 142 children                               | 65.0 $\pm$ 39.0<br>101.0 $\pm$ 59.0                      | Mean weight was higher in the latter group |
| People's Republic of China (1985) | Zhu <i>et al.</i> <sup>147</sup>         | Non-random sample of boys from two schools in Wuhan                                                                                 | 7–8 yr    | Seven 24-h urine collections             | 148 boys                                                                    | 128.8 $\pm$ 35.9                                         |                                            |
| People's Republic of China (n/a)  | Wu <i>et al.</i> <sup>79</sup>           | Non-random sample from rural area of Shaanxi                                                                                        | 12–16 yr  | Three consecutive 24-h urine collections | 94 boys and 87 girls                                                        | 174.4 $\pm$ 63.3                                         |                                            |

(continued)

Table 2 Continued

| Country (survey year) | References                                   | Sampling                                                                                   | Age range    | Measurement                          | Sample size                                                                                  | Mean sodium $\pm$ SD, mmol/day                                                                                 | Notes                                     |
|-----------------------|----------------------------------------------|--------------------------------------------------------------------------------------------|--------------|--------------------------------------|----------------------------------------------------------------------------------------------|----------------------------------------------------------------------------------------------------------------|-------------------------------------------|
| Poland (1986)         | Knuiman <i>et al.</i> <sup>81</sup>          | Random sample of boys from selected schools in Warsaw                                      | 8–9 yr       | Single 24-h urine collection         | 60 boys                                                                                      | 101.0 $\pm$ 38.7                                                                                               |                                           |
| Poland (1996–98)      | Hamulka and Gronowska-Senge <sup>88,a</sup>  | Regional                                                                                   | 9–11 yr      | Single 24-h dietary recall and FFQ   | 224 boys and girls: Boys Girls                                                               | 84.8 $\pm$ 25.2<br>114.7 $\pm$ 32.6                                                                            |                                           |
| Portugal (1986)       | Knuiman <i>et al.</i> <sup>81</sup>          | Random sample of boys from selected schools in Lisbon                                      | 8–9 yr       | Single 24-h urine collection         | 52 boys                                                                                      | 128.0 $\pm$ 43.3                                                                                               |                                           |
| Spain (1986)          | Knuiman <i>et al.</i> <sup>81</sup>          | Random sample of boys from selected schools in Madrid and Santiago                         | 8–9 yr       | Single 24-h urine collection         | Madrid: 57 boys<br>Santiago: 57 boys                                                         | 122.0 $\pm$ 40.0<br>127.0 $\pm$ 40.0                                                                           |                                           |
| Spain (1993–94)       | Maldonado-Martin <i>et al.</i> <sup>83</sup> | Random sample of children from public primary schools in the Almeria province              | 6–14 yr      | Single 24-h urine collection         | 274 boys<br>279 girls                                                                        | 142.2 $\pm$ 70.4<br>125.6 $\pm$ 53.5                                                                           |                                           |
| Sweden (1986)         | Knuiman <i>et al.</i> <sup>81</sup>          | Random sample of boys from selected schools in Lund                                        | 8–9 yr       | Single 24-h urine collection         | 40 boys                                                                                      | 97.0 $\pm$ 32.9                                                                                                |                                           |
| Sweden (1989–90)      | Bergstrom <i>et al.</i> <sup>91,a</sup>      | Non-random sample of boys and girls from four schools in the city of Umea                  | 14 and 17 yr | 7-day diet diary                     | 14 yr: 155 boys<br>14 yr: 189 girls<br>17 yr: 211 boys<br>17 yr: 176 girls                   | 130.7 $\pm$ 36.6<br>96.8 $\pm$ 23.4<br>152.1 $\pm$ 39.6<br>97.7 $\pm$ 28.3                                     |                                           |
| Sweden (1993–94)      | Samuelson <i>et al.</i> <sup>92,a</sup>      | Random sample of boys and girls from Uppsala and Trollhattan                               | 15 yr        | 7-day diet diary                     | Uppsala: 99 boys<br>Uppsala: 104 girls<br>Trollhattan: 85 boys<br>Trollhattan: 110 girls     | 155.3 $\pm$ 41.9<br>117.1 $\pm$ 26.8<br>143.0 $\pm$ 33.5<br>99.0 $\pm$ 23.7                                    |                                           |
| UK (1992–93)          | Gregory <i>et al.</i> <sup>148,a</sup>       | Nationally representative sample, NDNS                                                     | 1.5–4.5 yr   | 4-day weighed record                 | 848 boys<br>827 girls                                                                        | 66.6 $\pm$ 20.3<br>64.3 $\pm$ 20.6                                                                             |                                           |
| UK (1992–93)          | Brion <i>et al.</i> <sup>86</sup>            | Random sub-sample of children enrolled in the ALSPAC cohort, Avon                          | 4 mo 8 mo    | 1-day diet diary<br>3-day diet diary | 533 boys and girls<br>710 boys and girls                                                     | 7.2 $\pm$ 2.1 <sup>b</sup><br>23.1 $\pm$ 12.3 <sup>b</sup>                                                     |                                           |
| UK (1997)             | Gregory and Lowe <sup>38,a</sup>             | Nationally representative sample, NDNS                                                     | 4–18 yr      | 7-day weighed record                 | 856 boys<br>845 girls                                                                        | 114.3 $\pm$ 36.0<br>93.7 $\pm$ 25.2                                                                            |                                           |
| USA (1968–70)         | Watson <i>et al.</i> <sup>96</sup>           | Random sample stratified by race of black and white girls from schools in Hinds county, MS | 14–18 yr     | One-to-six 24-h urine collections    | 356 black girls<br>104 white girls                                                           | 112.8 $\pm$ 48.0<br>98.4 $\pm$ 50.4                                                                            |                                           |
| USA (1973–88)         | Nicklas <sup>149</sup>                       | Non-random sample of children from Bogalusa, LA, for the Bogalusa Heart Study              | 10 yr        | Single 24-h dietary recall           | 1973–74: 185<br>1976–77: 158<br>1978–79: 224<br>1981–82: 304<br>1984–85: 284<br>1987–88: 284 | 144.8 $\pm$ n/a<br>148.4 $\pm$ n/a<br>158.8 $\pm$ n/a<br>155.5 $\pm$ n/a<br>154.8 $\pm$ n/a<br>163.8 $\pm$ n/a | Study population<br>65% white, 50% female |

(continued)

Table 2 Continued

| Country (survey year) | References                             | Sampling                                                                                                                                                                      | Age range | Measurement                                           | Sample size                                            | Mean sodium $\pm$ SD, mmol/day                                               | Notes                                                                    |
|-----------------------|----------------------------------------|-------------------------------------------------------------------------------------------------------------------------------------------------------------------------------|-----------|-------------------------------------------------------|--------------------------------------------------------|------------------------------------------------------------------------------|--------------------------------------------------------------------------|
| USA (n/a)             | Cooper <i>et al.</i> <sup>84</sup>     | Non-random sample of black and white children from two Chicago, MI schools                                                                                                    | 11–14 yr  | Seven 24-h urine collections                          | 45 black children<br>28 white children                 | 140.0 $\pm$ 47.3<br>121.1 $\pm$ 34.3<br>149.2 $\pm$ 46.0<br>120.6 $\pm$ 37.6 | Black children one school year older than white children                 |
| USA (n/a)             | Ellison <i>et al.</i> <sup>93</sup>    | Non-random sample of participants from the Collaborative Perinatal Study cohort, Boston, MA                                                                                   | 16–17 yr  | Three overnight urine samples                         | 130 boys<br>118 girls                                  | 113.2 $\pm$ n/a <sup>c</sup><br>80.3 $\pm$ n/a <sup>c</sup>                  | Mean collection period 9.2 hours                                         |
| USA (n/a)             | Faust <i>et al.</i> <sup>150</sup>     | Non-random sample of residents from a rural area of Michigan                                                                                                                  | <18 yr    | Three overnight urines combined to give 24-h estimate | 36 boys and girls                                      | 103.9 $\pm$ 69.2                                                             |                                                                          |
| USA (n/a)             | Cooper <i>et al.</i> <sup>151</sup>    | Non-random sample of black children from five Chicago, MI schools                                                                                                             | 11–14 yr  | Seven 24-h urine collections                          | Three schools: 97 children<br>Two schools: 72 children | 126.8 $\pm$ 36.9<br>107.2 $\pm$ 35.5                                         |                                                                          |
| USA (1978–79)         | Connor <i>et al.</i> <sup>152</sup>    | Random sample of households in a suburb of Portland, OR                                                                                                                       | 6–15 yr   | Single 24-h urine collection                          | 115 boys and girls                                     | 102.0 $\pm$ 54.0                                                             |                                                                          |
| USA (1984)            | Witschi <i>et al.</i> <sup>153</sup>   | Non-random sample of children from two boarding high schools in Exeter, NH and Andover, MA                                                                                    | n/a       | Single 1-day food diary                               | 108 boys<br>92 girls                                   | 170.0 $\pm$ 64.0<br>109.7 $\pm$ 47.0                                         | High school implies children aged 14–17 yr                               |
| USA (n/a)             | Sanjur <i>et al.</i> <sup>154</sup>    | Non-random sample of low-income families visiting two healthcare centres in Denver, CO                                                                                        | 1–2 yr    | 3-day diet diary                                      | 90 boys and girls                                      | 58.4 $\pm$ 22.0                                                              | Families were mainly Hispanic<br>Discretionary salt use was not recorded |
| USA (n/a)             | Harshfield <i>et al.</i> <sup>85</sup> | Non-random sample of black and white children recruited from churches, schools and social organisations in Tennessee                                                          | 10–18 yr  | Single 24-h urine collection                          | 66 black children<br>74 white children                 | 144.4 $\pm$ 48.0<br>129.4 $\pm$ 54.0                                         |                                                                          |
| USA (n/a)             | Gillman <i>et al.</i> <sup>87</sup>    | Non-random sample of children: The Framingham Children's Study                                                                                                                | 3–5 yr    | Four 3-day diet diaries over a one yr period          | 89 boys and girls                                      | 88.9 $\pm$ 19.2                                                              | Uneven number of boys ( $n=55$ ) and girls ( $n=34$ )                    |
| USA (1987–1999)       | Simon <i>et al.</i> <sup>97</sup>      | Non-random sample of girls from schools in Richmond, CA and Cincinnati, OH. A random age-race stratified sample from families of the Group Health Association, Washington, DC | 9–10 yr   | 3-day diet diary                                      | 987 black girls<br>1043 white girls                    | 133.6 $\pm$ 46.6<br>121.9 $\pm$ 36.2                                         |                                                                          |

(continued)



Table 2 Continued

| Country (survey year) | References                            | Sampling                                                                                                                           | Age range | Measurement                                                                                               | Sample size                                                                                                                                             | Mean sodium $\pm$ SD, mmol/day                                                                                                                                                   | Notes                                      |
|-----------------------|---------------------------------------|------------------------------------------------------------------------------------------------------------------------------------|-----------|-----------------------------------------------------------------------------------------------------------|---------------------------------------------------------------------------------------------------------------------------------------------------------|----------------------------------------------------------------------------------------------------------------------------------------------------------------------------------|--------------------------------------------|
| USA (1991–97)         | Lytle <i>et al.</i> <sup>98</sup>     | Non-random sample of children recruited for the CATCH trial, from schools in CA, LA, MN and TX                                     | 8–14 yr   | 24-h dietary recall at school grades 3, 5 and 8                                                           | Grade 3: 226 black<br>284 Hispanic<br>1297 white<br>Grade 5: 145 black<br>209 Hispanic<br>958 white<br>Grade 8: 183 black<br>215 Hispanic<br>1043 white | 132.8 $\pm$ 43.8<br>132.7 $\pm$ 45.4<br>135.2 $\pm$ 47.0<br>133.4 $\pm$ 42.9<br>136.4 $\pm$ 44.6<br>136.3 $\pm$ 45.8<br>138.6 $\pm$ 43.5<br>141.4 $\pm$ 44.0<br>141.2 $\pm$ 46.3 |                                            |
| USA (1998)            | Gilliland <i>et al.</i> <sup>94</sup> | Non-random sample of children enrolled in schools participating in Children's Health Study, within 200km radius of Los Angeles, CA | 11–19 yr  | FFQ                                                                                                       | 1177 boys:<br>11–14 yr<br>15–16 yr:<br>17–19 yr:<br>1389 girls:<br>11–14 yr:<br>15–16 yr:<br>17–19 yr:                                                  | 109.5 $\pm$ 48.3<br>103.6 $\pm$ 42.9<br>112.4 $\pm$ 44.2<br>99.4 $\pm$ 44.7<br>95.3 $\pm$ 40.3<br>98.6 $\pm$ 40.0                                                                | Top SD appears to be a typographical error |
| USA (n/a)             | Zive <i>et al.</i> <sup>155</sup>     | Non-random sample of children recruited for the Study of Children's Activity and Nutrition from 63 schools and children's centres  | 4–12 yr   | Two 24-h recalls (with mealtime observation for ages 4–7 yr) at baseline, 6, 12, 18, 24, 30, 78 and 84 mo | Baseline to 30 mo: 207<br>78–84 mo: 228                                                                                                                 | 80.5 $\pm$ 2.0<br>147.6 $\pm$ 45.7                                                                                                                                               |                                            |
| USA (1999–2000)       | Wright <i>et al.</i> <sup>137</sup>   | Nationally representative sample (excluding nursing infants), NHANES 1999–2000                                                     | 0–19 yr   | Single 24-h dietary recall                                                                                | Boys<br><6 yr: 628<br>6 to 11 yr: 494<br>12 to 19 yr: 1105<br>Girls<br><6 yr: 567<br>6–11 yr: 468<br>12–19 yr: 1103                                     | 96.7 $\pm$ 78.3<br>152.2 $\pm$ 209.8<br>183.2 $\pm$ 181.8<br>86.7 $\pm$ 74.1<br>130.1 $\pm$ 92.8<br>132.2 $\pm$ 130.1                                                            |                                            |
| USA (2002)            | Heird <i>et al.</i> <sup>156</sup>    | National random sample of children                                                                                                 | 4–24 mo   | Single 24-h dietary recall                                                                                | 4–5 mo: 624<br>6–11 mo: 1395<br>12–24 mo: 1003                                                                                                          | 8.2 $\pm$ n/a<br>21.4 $\pm$ n/a<br>71.2 $\pm$ n/a                                                                                                                                |                                            |

<sup>a</sup>Source: Lambert *et al.*<sup>33</sup><sup>b</sup>Standard deviation estimated by:  $0.7413 \times \text{inter-quartile range}$ , assuming normal distribution.<sup>c</sup>Converted to mmol/day by:  $[\text{sodium (mmol)}/(9.2 \text{ h}) \times 24 \text{ h}]$ .

Sodium: 1 mmol = 23 mg.

ALSPAC, Avon Longitudinal Study of Parents and Children; CATCH, Child and Adolescent Trial for Cardiovascular Health; DONALD, Dortmund Nutritional and Anthropometric Longitudinally Designed Study; FFQ, food frequency questionnaire; mo, months; n/a, not available; NDNS, National Diet and Nutrition Survey; NHANES, National Health and Nutrition Examination Survey; SD, standard deviation; yr, years.

are likely to reflect differences in total food consumption as well as differences in food choices: the greater energy requirement in older compared with younger children, and in males compared with females, leads to greater sodium consumption, independent of food choice.

Estimates from four US studies indicate that black children consume and excrete more sodium than their white peers.<sup>84,85,96,97</sup> Among these studies, mean sodium intake was ~15 mmol/day higher in black than white children. One study, however, found no significant differences between black, white and Hispanic children aged 8–14, based on 24-h recalls collected prospectively in school grades 3, 5 and 7.<sup>98</sup>

### Food sources of sodium

#### Adults

In European and Northern American diets, an estimated 75% of sodium intake comes from processed or restaurant-prepared foods; 10–12% occurs naturally in foods; and a similar proportion is from discretionary use at home or at the table.<sup>26,27</sup> Table 3 lists the differences in salt content between processed and unprocessed varieties for selected common foods; tinned salmon, for example, contains five times the sodium content of fresh steamed salmon, while smoked salmon contains 16 times as much. The point is further illustrated in Figure 1, which presents home-cooked and ready-meal versions of two popular dishes, along with their respective sodium content. According to UK National Food Survey data collected in 2000, cereal products (including bread, other baked goods and breakfast cereals) accounted for the greatest proportion (38%) of household sodium intake. The second largest source (21%) was meat products (including processed meats such as ham, bacon, etc.), though salt added at the table or consumed away from home was not measured.<sup>99</sup> Data from the USA CSFII (1994–96) show a similar pattern: cereals and baked goods providing >16% sodium; meat products >13%. Estimates did not include salt from disaggregated multi-component foods, or certain meat products including hot dogs and bacon—both high sodium foods.<sup>100</sup>

A different picture with regard to dietary sources of sodium is apparent for some Asian countries. In PRC and Japan, the greatest proportion of dietary sodium comes from salt added during cooking and sauces, including soy sauce and (in Japan) miso. In the Chinese Health and Nutrition Survey 2002, 72% of sodium was from salt added during cooking and 8% from soy sauce (Table 4).<sup>101</sup> Unpublished INTERMAP data reflect closely these survey data for PRC: main sources were salt added in home cooking or at the table (76%) and soy sauce (6.4%); in Japan main sources were soy sauce (20%), salted vegetables and fruits (9.8%), miso soup (9.7%), fresh and salted

**Table 3** Comparing the sodium content of unprocessed and processed foods<sup>100</sup>

| Food item            | Description                                 | Sodium content (mmol/100 g) |
|----------------------|---------------------------------------------|-----------------------------|
| Beef                 | Topside, roast, lean and fat                | 2.1                         |
|                      | Corned beef, canned                         | 41.3                        |
| Bran                 | Bran, wheat                                 | 1.2                         |
|                      | Bran flakes                                 | 43.5                        |
| Cheese               | Hard cheese, average                        | 27.0                        |
|                      | Processed cheese                            | 57.4                        |
| Chick peas           | Dried, boiled in unsalted water             | 0.2                         |
|                      | Canned, re-heated, drained                  | 9.6                         |
| Crab                 | Boiled                                      | 16.1                        |
|                      | Canned                                      | 23.6                        |
| Cod                  | Cod, in batter, fried in blended oil        | 4.3                         |
|                      | Fish fingers, fried in blended oil          | 15.2                        |
| New potatoes         | Raw, boiled in unsalted water               | 0.4                         |
|                      | Canned, re-heated, drained                  | 10.9                        |
| Peanuts              | Plain                                       | 0.1                         |
|                      | Dry roasted                                 | 34.3                        |
|                      | Roasted and salted                          | 17.4                        |
| Peas                 | Raw, boiled in unsalted water               | Trace                       |
|                      | Canned, re-heated, drained                  | 10.9                        |
| Potato chips (fries) | Homemade, fried in blended oil              | 0.5                         |
|                      | Oven chips, frozen, baked                   | 2.3                         |
| Salmon               | Raw, steamed                                | 4.8                         |
|                      | Canned                                      | 24.8                        |
|                      | Smoked                                      | 81.7                        |
| Sweet corn           | On-the-cob, whole, boiled in unsalted water | Trace                       |
|                      | Kernels, canned, re-heated, drained         | 11.7                        |
| Tuna                 | Raw                                         | 2.0                         |
|                      | Canned in oil, drained                      | 12.6                        |
|                      | Canned in brine, drained                    | 13.9                        |

Sodium: 1 mmol = 23 mg.

fish (9.5%) and salt added in restaurants, fast food and at home (9.5%).<sup>102</sup>

#### Children

Data on food sources of sodium are limited. In UK children and adolescents aged 4–18 years, surveyed for the UK Diet and Nutrition Survey 1992, major sources of sodium reflect those for adults: cereals contribute 38–40%, meat products 20–24%.<sup>103</sup>

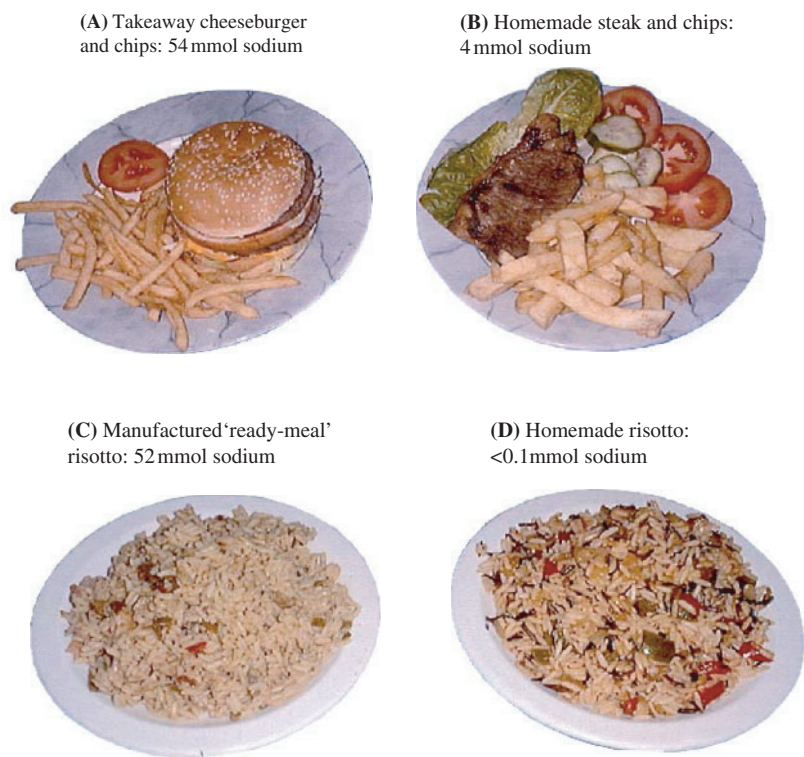

**Figure 1** The sodium content of manufactured (A,C) and homemade (B,D) meals  
Sodium: 1 mmol = 23 mg

**Table 4** Mean intake of sodium, overall, by source and by area, for the participants of China Health and Nutrition Survey, 2002<sup>a,101</sup>

| Area    | Total sodium <sup>b</sup><br>mmol/day | Sodium from<br>cooking salt<br>mmol/day (%) | Sodium from<br>soy sauce<br>mmol/day (%) | Sodium from<br>other seasonings<br>mmol/day (%) | Sodium from<br>other sources<br>mmol/day (%) |
|---------|---------------------------------------|---------------------------------------------|------------------------------------------|-------------------------------------------------|----------------------------------------------|
| Urban   | 261.2                                 | 174.0 (66.6)                                | 26.4 (10.1)                              | 9.7 (3.7)                                       | 51.2 (19.6)                                  |
| Rural   | 276.9                                 | 205.5 (74.2)                                | 20.8 (7.5)                               | 8.9 (3.2)                                       | 41.8 (15.1)                                  |
| Overall | 272.5                                 | 196.5 (72.1)                                | 22.3 (8.2)                               | 9.0 (3.3)                                       | 44.4 (16.3)                                  |

<sup>a</sup>A multi-stage, random cluster method was used to select ~15 000 individuals, aged ≥2 years and over, from nine provinces.

<sup>b</sup>Sodium intake was estimated from 3-day weighed food records (2 work days and 1 rest day).  
Sodium: 1 mmol = 23 mg.

Among US girls who reported that they ate fast food at least four times a week, sodium intake was higher than among girls who ate fast food less than once a week (mean 140.7 vs 134.1 mmol/day,  $P < 0.001$ ).

## Discussion

Sodium intakes of different populations around the world vary markedly. The report of a joint WHO/FAO Expert Consultation on 'Diet, Nutrition and the Prevention of Chronic Diseases' recommends that sodium intake of adults should be <85 mmol/day (2 g/d).<sup>104</sup> In the vast majority of populations, salt intake is high

and well above recommended daily intakes. High intakes, which tend to increase with age, are also reported among children and young adults.

There is strong and consistent evidence from animal studies, clinical trials and epidemiological data both within and across populations implicating high salt intake as an important risk factor for high BP among both hypertensive and normotensive individuals;<sup>2-8</sup> high salt intake is also associated with increased risk of future CHD and stroke.<sup>9-12</sup> Nonetheless, most adult populations have mean sodium intakes well in excess of 100 mmol/day (2.30 g/d), and in many (especially the Asian countries) in excess of 200 mmol/day (4.60 g/day)—three times the current US

guideline amount for middle-aged and older adults (65 mmol/day, 1.5 g/day).<sup>105</sup> Salt has historically been used as a method of food preservation; however, with the introduction in the 20th century of the modern refrigerator in many countries, this need has been reduced. While extremely high intakes reported in the late 1950s and the early 1960s in some countries, notably northern Japan, are no longer apparent, there is evidence to suggest that in some countries sodium intake may be on the rise.<sup>73</sup> At the same time, few countries have policies for targeted reductions in salt intake.

There are differences between developed and developing countries with regard to dietary sources of salt. In European and Northern American diets, a large proportion of the sodium ingested (as high as 75% in USA and UK) is added (as sodium chloride) in food manufacture and foods eaten away from the home.<sup>26,27</sup> Therefore, sodium is often 'hidden' in foods and individuals are unaware of the amount of salt they consume. Personal efforts to reduce salt intake may be hampered by the large quantities of salt found in processed foods: unpublished INTERMAP data show that for individuals who made a conscious effort to reduce salt intake compared to others, sodium excretion was greatly reduced only among the rural PRC samples (by 55.9 mmol/day,  $P < 0.05$ ); smaller decreases were observed for Japanese and Americans (18.9 and 13.6 mmol/day, respectively, both  $P < 0.05$ ); no difference was seen for UK participants (Okuda, N., personal communication). Therefore, public health initiatives to limit salt consumption can only be effective in tandem with government/industry initiatives to reduce the salt content of processed foods.<sup>106,107</sup>

In Finland, which has been subject to a comprehensive public health campaign in collaboration with the food industry to reduce CVD, marked reductions in salt intake were documented over a 20-year period, which coincided with a decrease of ~60% in both CHD and stroke mortality.<sup>24,108</sup> Since 2004 the UK Food Standards Agency has addressed sodium reduction concomitantly on two fronts: a media campaign (originally featuring on a hapless cartoon slug named 'Sid') to increase public awareness;<sup>109</sup> and voluntary salt reduction targets for 85 categories of processed foods for the food industry. As a result, major retailers, manufacturers, caterers and trade associations are reporting reductions in the sodium content of a wide variety of processed foods;<sup>110</sup> and recent population survey data indicate that UK sodium intakes are falling.<sup>76</sup> Similar public health approaches are needed in other developed countries to limit the amount of salt consumed and consequently decrease the burden of cardiovascular morbidity and mortality worldwide. Research has shown that lower sodium concentration in foods can be readily achieved; one-quarter reduction in the sodium

content of sliced white bread can be delivered largely unnoticed in the population.<sup>111</sup>

In 2000, ~7.1 million deaths worldwide were attributed to non-optimal BP.<sup>112,113</sup> Lowering the salt intake of individuals around the world is expected to shift the population distribution of BP towards more optimal levels, thus preventing thousands of deaths from CVD and stroke, and reducing the burden on overstretched health services. In the UK, for example, it was estimated that a population-wide reduction in sodium intake of 100 mmol/day would lead to mean systolic and diastolic BP falls of 5.0 and 2.8 mm Hg, preventing nearly 22 000 deaths from CHD and 15 000 deaths from stroke.<sup>114</sup> Sodium reduction is one of the easiest to implement, cost-effective and efficient ways to reduce the global burden of CVD and thus should not be overlooked.<sup>115</sup>

A different picture with regard to dietary sources of sodium is apparent in some developing countries, where sodium in the diet comes mainly from salt added during cooking and from sauces (e.g. soy sauce in China). These countries are amid an epidemiological transition with increasing rates of chronic diseases including hypertension and CVD.<sup>116,117</sup> There is therefore the opportunity for timely community-based, context-specific initiatives to limit the amount of salt added to food by individuals.<sup>36</sup> It is also essential, given the increasing westernization of these cultures, to encourage low levels of salt content in processed foods, which are likely to become increasingly available in the developing world. Such initiatives are needed to tackle the forecasted epidemic of CVD in developing countries.

Data on sodium intakes of children and young people are limited. Data presented here show high intakes even at young ages and a trend of sodium intake to increase with age. Higher intake in infancy has been linked with higher BP later in life.<sup>86,89</sup> Modest reductions in salt intake in childhood could help stem the rise in BP observed with age and prevent future CVD events.<sup>8</sup> Salt intake has recently been proposed as a major determinant of sugar-sweetened soft-drink consumption in children,<sup>118</sup> which in turn has been related to childhood obesity—an independent risk factor for high BP and CVD.<sup>119</sup> Further studies are needed to provide contemporaneous, valid information on sodium intake in young populations around the world, as current data have limited validity and comparability.

Detection and treatment of hypertension is a major component of cardiovascular risk reduction. However, the underlying causes of hypertension, such as poor diet, are often left 'untreated'. Patients with drug-treated hypertension are at higher risk of CVD than individuals with normal BP.<sup>120,121</sup> Similarly, amongst drug-treated hypertensives, those with unhealthy lifestyle are at a higher risk of CVD than those with healthy lifestyle.<sup>120,121</sup> There is also evidence that



reduced salt intake in treated individuals may reduce the number and dose of drugs or obviate the need for treatment.<sup>122–124</sup> Our review shows that in the vast majority of populations salt intake is well above the recommended levels. Public health initiatives, in tandem with efforts by the food industry, are urgently needed to lower salt consumption and consequently lower CVD burden and increase life expectancy. Such public health approaches can be simple, low-cost and effective.

## Supplementary data

Supplementary data are available at *IJE* online.

## Acknowledgements

We thank the INTERSALT Editorial and Steering Committee; the INTERMAP International Steering and Editorial Committee, Nagako Okuda, and Cheryl

Anderson for permission to present unpublished INTERMAP data. Thanks are due also to Liancheng Zhao for help obtaining and translating Chinese survey data. An earlier version of this report was presented at the World Health Organization Forum and Technical Meeting: Reducing Salt Intake in Populations, 5–7 October 2006, Paris, France. The named authors alone are responsible for the views expressed in this publication. The publication does not necessarily represent the decisions or the stated policy of the World Health Organization and the designations employed and the presentation of the material in this publication do not imply the expression of any opinion whatsoever on the part of the World Health Organization.

**Conflicts of interest:** WHO commissioned a background paper on 'Salt intakes around the world' from PE and IJB, presented during the WHO Forum and Technical Meeting on Reducing Salt Intakes in Populations (2006). PE is a member of CASH (Consensus Action on Salt and Health).

### KEY MESSAGES

- High levels of dietary sodium (consumed as common salt, sodium chloride) are associated with raised BP and adverse cardiovascular health.
- The report of a joint WHO/FAO Expert Consultation on 'Diet, Nutrition and the Prevention of Chronic Diseases' recommends that sodium intake of adults should be <85 mmol/day (2 g/day). Most adult populations around the world have mean sodium intakes well in excess of 100 mmol/day.
- Sodium intakes are commonly in excess of 100 mmol/day in children >5 years old.
- In European and North American countries, sodium intake is dominated by sodium added in manufactured foods.
- In Japan and China, salt added at home and soy sauce are the largest sources.

## References

- Conlin PR. Eat your fruits and vegetables but hold the salt. *Circulation* 2007;**116**:1530–31.
- Sacks FM, Svetkey LP, Vollmer WM *et al.* Effects on blood pressure of reduced dietary sodium and the Dietary Approaches to Stop Hypertension (DASH) diet. *N Engl J Med* 2001;**344**:3–10.
- Elliott P, Walker LL, Little MP *et al.* Change in salt intake affects blood pressure of chimpanzees: implications for human populations. *Circulation* 2007;**116**:1563–68.
- Cutler JA, Allender PS. Randomized trials of sodium reduction: an overview. *Am J Clin Nutr* 1997;**65** (suppl):643S–51S.
- Midgley JP, Matthew AG, Greenwood CM, Logan AG. Effect of reduced dietary sodium on blood pressure: a meta-analysis of randomized controlled trials. *J Am Med Assoc* 1996;**275**:1590–97.
- Graudal NA, Galloe AM, Garred P. Effects of sodium restriction on blood pressure, renin, aldosterone, catecholamines, cholesterols, and triglyceride: a meta-analysis. *J Am Med Assoc* 1998;**279**:1383–91.
- Elliott P. Observational studies of salt and blood pressure. *Hypertension* 1991;**17** (suppl 1):I-3–I-8.
- INTERSALT Cooperative Research Group. Intersalt: an international study of electrolyte excretion and blood pressure. Results for 24 hour urinary sodium and potassium excretion. *Brit Med J* 1988;**297**:319–28.
- He J, Whelton PK, Appel LJ, Charleston J, Klag MJ. Long-term effects of weight loss and dietary sodium reduction on incidence of hypertension. *Hypertension* 2000;**35**:544–49.
- Cook NR, Cutler JA, Obarzanek E *et al.* Long term effects of dietary sodium reduction on cardiovascular disease outcomes: observational follow-up of the Trials Of Hypertension Prevention (TOHP). *Brit Med J* 2007;**334**:885.
- Xie J, Sasaki S, Joossens J, Kesteloot H. The relationship between urinary cations obtained from the INTERSALT study and cerebrovascular mortality. *J Hum Hypertens* 1992;**6**:17–21.



- <sup>12</sup> Antonios TFT, MacGregor GA. Salt—more adverse effects. *Lancet* 1996;**348**:250–51.
- <sup>13</sup> Dahl LK. Possible role of salt intake in the development of essential hypertension. In: Cottier P, Bock D (eds). *Essential Hypertension – An International Symposium*. Berlin: Springer, 1960. pp. 52–65.
- <sup>14</sup> Sasaki N. High blood pressure and the salt intake of the Japanese. *Int Heart J* 1962;**3**:313–24.
- <sup>15</sup> Gleiberman L. Blood pressure and dietary salt in human populations. *Ecol Food Nutr* 1973;**2**:143–56.
- <sup>16</sup> Froment A, Milon H, Gravier C. Relationship of sodium intake and arterial hypertension. Contribution of geographical epidemiology. *Rev Epidemiol Sante Publique* 1979;**27**:437–54.
- <sup>17</sup> Oliver WJ, Cohen EL, Neel JV. Blood pressure, sodium intake, and sodium related hormones in the Yanomamo Indians, a “no-salt” culture. *Circulation* 1975;**52**:146–51.
- <sup>18</sup> Kesteloot H, Song CS, Song JS, Park BC, Brems-Heys E, Joossens JV. An epidemiological survey of arterial blood pressure in Korea using home reading. In: Rorive G, Van Cauwenberge H (eds). *The Arterial Hypertensive Disease: A Symposium*. Paris: Masson, 1978. pp. 141–48.
- <sup>19</sup> Moser M, Morgan R, Hale M *et al*. Epidemiology of hypertension with particular reference to the Bahamas. I. Preliminary report of blood pressures and review of possible etiologic factors. *Am J Cardiol* 1959;**4**:727–33.
- <sup>20</sup> Elliott P, Stamler J, Nichols R *et al*. Intersalt revisited: Further analyses of 24 hour sodium excretion and blood pressure within and across populations. Intersalt Cooperative Research Group. *Brit Med J* 1996;**312**:1249–53.
- <sup>21</sup> Sasaki N. Epidemiological studies on hypertension in northeast Japan. In: Kesteloot H, Joossens JV (eds). *Epidemiology of Arterial Blood Pressure*. The Hague: Martinus Nijhoff Publishers, 1980. pp. 367–77.
- <sup>22</sup> Joossens JV, Sasaki S, Kesteloot H. Bread as a source of salt: an international comparison. *J Am Coll Nutr* 1994;**13**:179–83.
- <sup>23</sup> Gilbert PA, Heiser G. Salt and health: the CASH and BPA perspective. *Nutr Bull* 2005;**30**:62–69.
- <sup>24</sup> Laatikainen T, Pietinen P, Valsta L, Sundvall J, Reinivuo H, Tuomilehto J. Sodium in the Finnish diet: 20-year trends in urinary sodium excretion among the adult population. *Eur J Clin Nutr* 2006;**60**:965–70.
- <sup>25</sup> Engstrom A, Tobelmann RC, Albertson AM. Sodium intake trends and food choices. *Am J Clin Nutr* 1997;**65** (Suppl):704S–7S.
- <sup>26</sup> James WP, Ralph A, Sanchez-Castillo CP. The dominance of salt in manufactured food in the sodium intake of affluent societies. *Lancet* 1987;**1**:426–29.
- <sup>27</sup> Mattes RD, Donnelly D. Relative contributions of dietary sodium sources. *J Am Coll Nutr* 1991;**10**:383–93.
- <sup>28</sup> Rose G, Stamler J. The INTERSALT Study: background, methods and main results. *J Hum Hypertens* 1989;**3**:283–88.
- <sup>29</sup> Stamler J, Elliott P, Dennis B *et al*. INTERMAP: background, aims, design, methods, and descriptive statistics (nondietary). *J Hum Hypertens* 2003;**17**:591–608.
- <sup>30</sup> Dennis B, Stamler J, Buzzard M *et al*. INTERMAP: the dietary data – process and quality control. *J Hum Hypertens* 2003;**17**:609–22.
- <sup>31</sup> Elliott P, Stamler R. Manual of operations for “INTERsalt”, an international cooperative study on the relation of sodium and potassium to blood pressure. *Control Clin Trials* 1988;**9** (Suppl):1S–117S.
- <sup>32</sup> Sasaki N. The relationship of salt intake to hypertension in the Japanese. *Geriatrics* 1964;**19**:735–44.
- <sup>33</sup> Lambert J, Agostoni C, Elmadfa I *et al*. Dietary intake and nutritional status of children and adolescents in Europe. *Brit J Nutr* 2004;**92** (Suppl 2):S147–S211.
- <sup>34</sup> Simons-Morton DG, Obarzanek E. Diet and blood pressure in children and adolescents. *Pediatr Nephrol* 1997;**11**:244–49.
- <sup>35</sup> Azizi F, Rahmani M, Allahverdian S, Hedayati M. Effects of salted food consumption on urinary iodine and thyroid function tests in two provinces in the Islamic Republic of Iran. *East Mediterr Health J* 2001;**7**:115–20.
- <sup>36</sup> Li N, Neal B, Wu Y *et al*. Salt substitution: a low-cost strategy for blood pressure control among rural Chinese. A randomized, controlled trial. *J Hypertens* 2007;**25**:2011–18.
- <sup>37</sup> Pistelli R, Forastiere F, Corbo GM *et al*. Respiratory symptoms and bronchial responsiveness are related to dietary salt intake and urinary potassium excretion in male children. *Eur Respir J* 1993;**6**:517–22.
- <sup>38</sup> Gregory J, Lowe S. National Diet and Nutrition Survey: young people aged 4 to 18 years. Vol. 1, Report of the Diet and Nutrition Survey. London: HMSO, 2000.
- <sup>39</sup> Hollenberg NK, Martinez G, McCullough M *et al*. Aging, acculturation, salt intake, and hypertension in the Kuna of Panama. *Hypertension* 1997;**29**:171–76.
- <sup>40</sup> Bingham S. The dietary assessment of individuals; methods, accuracy, new techniques and recommendations. *Nutr Abstr Rev A Hum Exp* 1987;**57**:705–42.
- <sup>41</sup> Bates CJ, Thurnham DI. Biochemical markers of nutrient intake. In: Margetts BM, Nelson M (eds). *Design Concepts in Nutritional Epidemiology*. Oxford: Oxford University Press, 1991. pp. 192–265.
- <sup>42</sup> Hunter D. Biochemical indicators of dietary intake. In: Willett W (ed.). *Nutritional Epidemiology*. 2nd edn. Oxford: Oxford University Press, 1998. pp. 174–243.
- <sup>43</sup> Wesson LG, Jr. Electrolyte excretion in relation to diurnal cycles of renal function. *Medicine* 1964;**43**:547–92.
- <sup>44</sup> Holbrook JT, Patterson KY, Bodner JE *et al*. Sodium and potassium intake and balance in adults consuming self-selected diets. *Am J Clin Nutr* 1984;**40**:786–93.
- <sup>45</sup> Baldwin U, Alexander RW, Warner EG. Chronic sodium chloride challenge studies in man. *J Lab Clin Med* 1960;**55**:362–75.
- <sup>46</sup> Kirkendall AM, Connor WE, Abboud F, Rastogi SP, Anderson TA, Fry M. The effect of dietary sodium chloride on blood pressure, body fluids, electrolytes, renal function, and serum lipids of normotensive man. *J Lab Clin Med* 1976;**87**:411–34.
- <sup>47</sup> Dahl LK. Salt intake and salt need. *N Engl J Med* 1958;**258**:1205–8.
- <sup>48</sup> Doyle AE, Chua KG, Duffy S. Urinary sodium, potassium and creatinine excretion in hypertensive and normotensive Australians. *Med J Aust* 1976;**2**:898–900.
- <sup>49</sup> Schachter J, Harper PH, Radin ME, Caggiula AW, McDonald RH, Diven WF. Comparison of sodium and potassium intake with excretion. *Hypertension* 1980;**2**:695–99.

- <sup>50</sup> Ljungman S, Aurell M, Hartford M, Wikstrand J, Wilhelmsen L, Berglund G. Sodium excretion and blood pressure. *Hypertension* 1981;**3**:318–26.
- <sup>51</sup> Bingham S, Cummings JH. The use of 4-aminobenzoic acid as a marker to validate the completeness of 24 h urine collections in man. *Clin Sci* 1983;**64**:629–35.
- <sup>52</sup> Dyer AR, Shipley M, Elliott P. Urinary electrolyte excretion in 24 hours and blood pressure in the INTERSALT Study. I. Estimates of reliability. The INTERSALT Cooperative Research Group. *Am J Epidemiol* 1994;**139**:927–39.
- <sup>53</sup> Pietinen PI, Findley TW, Clausen JD, Finnerty FA Jr., Altschul AM. Studies in community nutrition: Estimation of sodium output. *Prev Med* 1976;**5**:400–7.
- <sup>54</sup> Dyer AR, Stamler R, Grimm R *et al.* Do hypertensive patients have a different diurnal pattern of electrolyte excretion? *Hypertension* 1987;**10**:417–24.
- <sup>55</sup> Liu K, Dyer AR, Cooper RS, Stamler R, Stamler J. Can overnight urine replace 24-hour urine collection to assess salt intake? *Hypertension* 1979;**1**:529–36.
- <sup>56</sup> Luft FC, Fineberg NS, Sloan RS. Overnight urine collections to estimate sodium intake. *Hypertension* 1982;**4**:494–98.
- <sup>57</sup> Luft FC, Fineberg NS, Sloan RS. Estimating dietary sodium intake in individuals receiving a randomly fluctuating intake. *Hypertension* 1982;**4**:805–8.
- <sup>58</sup> Clark AJ, Mossholder S. Sodium and potassium intake measurements: Dietary methodology problems. *Am J Clin Nutr* 1986;**43**:470–76.
- <sup>59</sup> Caggiula AW, Wing RR, Nowalk MP, Milas NC, Lee S, Langford H. The measurement of sodium and potassium intake. *Am J Clin Nutr* 1985;**42**:391–98.
- <sup>60</sup> Espeland MA, Kumanyika S, Wilson AC *et al.* Statistical issues in analyzing 24-hour dietary recall and 24-hour urine collection data for sodium and potassium intakes. *Am J Epidemiol* 2001;**153**:996–1006.
- <sup>61</sup> Khaw KT, Bingham S, Welch A *et al.* Blood pressure and urinary sodium in men and women: The Norfolk Cohort of the European Prospective Investigation into Cancer (EPIC-Norfolk). *Am J Clin Nutr* 2004;**80**:1397–403.
- <sup>62</sup> Liu K, Cooper R, McKeever J *et al.* Assessment of the association between habitual salt intake and high blood pressure: methodological problems. *Am J Epidemiol* 1979;**110**:219–26.
- <sup>63</sup> Galanis DJ, McGarvey ST, Quested C, Sio B, Afele-Fa'amuli SA. Dietary intake of modernizing Samoans: implications for risk of cardiovascular disease. *J Am Diet Assoc* 1999;**99**:184–90.
- <sup>64</sup> Cooper R, Rotimi C, Ataman S *et al.* The prevalence of hypertension in seven populations of west African origin. *Am J Public Health* 1997;**87**:160–68.
- <sup>65</sup> Cappuccio FP, Kerry SM, Micah FB, Plange-Rhule J, Eastwood JB. A community programme to reduce salt intake and blood pressure in Ghana. *BMC Public Health* 2006;**6**:13.
- <sup>66</sup> Schroder H, Schmelz E, Marrugat J. Relationship between diet and blood pressure in a representative Mediterranean population. *Eur J Nutr* 2002;**41**:161–67.
- <sup>67</sup> Liu SM, Chung C. Trace-elements in Taiwanese diet in different seasons. *J Radioanal Nucl Chem* 1992;**161**:27–38.
- <sup>68</sup> Pavan L, Casiglia E, Pauletto P *et al.* Blood pressure, serum cholesterol and nutritional state in Tanzania and in the Amazon: comparison with an Italian population. *J Hypertens* 1997;**15**:1083–90.
- <sup>69</sup> Negretti de Bratter VE, Bratter P, Oliver W, Alvarez N. Study of the trace element status and the dietary intake of mineral and trace elements in relation to the gastric cancer incidence in Táchira, Venezuela. In: Coltery P, Bratter P, Negretti de Bratter VE, Khassanova L, Etienne J-C (eds). *Metal Ions in Biology and Medicine*. Paris: John Libbey Eurotext, 1998. pp. 557–65.
- <sup>70</sup> Liu L, Liu L, Ding Y *et al.* Ethnic and environmental differences in various markers of dietary intake and blood pressure among Chinese Han and three other minority peoples of China: results from the WHO Cardiovascular Diseases and Alimentary Comparison (CARDIAC) Study. *Hyperten Res Clin Exp* 2001;**24**:315–22.
- <sup>71</sup> Nan Y, Tian HG, Shao RC *et al.* Assessment of sodium and potassium in processed foods in an urban area in China. *Eur J Clin Nutr* 1995;**49**:299–306.
- <sup>72</sup> Katanoda K, Matsumura Y. National Nutrition Survey in Japan—its methodological transition and current findings. *J Nutr Sci Vitaminol* 2002;**48**:423–32.
- <sup>73</sup> Nakagawa H, Morikawa Y, Okayama A *et al.* Trends in blood pressure and urinary sodium and potassium excretion in Japan: reinvestigation in the 8th year after the Intersalt Study. *J Hum Hypertens* 1999;**13**:735–41.
- <sup>74</sup> Joossens JV, Kesteloot H. Trends in systolic blood pressure, 24-hour sodium excretion, and stroke mortality in the elderly in Belgium. *Am J Med* 1991;**90** (Suppl): 5S–11S.
- <sup>75</sup> Henderson L, Irving K, Gregory J *et al.* The National Diet & Nutrition Survey: adults aged 19 to 64 years. Vol. 3. Vitamin and mineral intake and urinary analytes. London: HMSO, 2003.
- <sup>76</sup> National Centre for Social Research. An assessment of dietary sodium levels among adults (aged 19–64) in the UK general population in 2008, based on analysis of dietary sodium in 24 hour urine samples. UK: Food Standards Agency, 2008.
- <sup>77</sup> Loria CM, Obarzanek E, Ernst ND. Choose and prepare foods with less salt: Dietary advice for all Americans. *J Nutr* 2001;**131** (Suppl):536S–51S.
- <sup>78</sup> Lyhne A. Dietary habits and physical activity of Danish adolescents. *Scand J Nutr* 1998;**42**:13–16.
- <sup>79</sup> Wu Y, Cai R, Zhou B, Xu X. Effects of genetic factors and dietary electrolytes on blood pressure of rural secondary school students in Hanzhong. *Chin Med Sci J* 1991;**6**: 148–52.
- <sup>80</sup> Staessen J, Bulpitt C, Fagard R, Joossens JV, Lijnen P, Amery A. Four urinary cations and blood pressure. A population study in two Belgian towns. *Am J Epidemiol* 1983;**117**:676–87.
- <sup>81</sup> Knuiman JT, Hautvast JG, Zwiauer KF *et al.* Blood pressure and excretion of sodium, potassium, calcium and magnesium in 8- and 9-year old boys from 19 European centres. *Eur J Clin Nutr* 1988;**42**:847–55.
- <sup>82</sup> Geleijnse JM, Grobbee DE, Hofman A. Sodium and potassium intake and blood pressure change in childhood. *Brit Med J* 1990;**300**:899–902.
- <sup>83</sup> Maldonado-Martin A, Garcia-Matarin L, Gil-Extremuera B *et al.* Blood pressure and urinary excretion of electrolytes in Spanish schoolchildren. *J Hum Hypertens* 2002;**16**: 473–78.

- <sup>84</sup> Cooper R, Soltero I, Liu K, Berkson D, Levinson S, Stamler J. The association between urinary sodium excretion and blood pressure in children. *Circulation* 1980;**62**:97–104.
- <sup>85</sup> Harshfield GA, Alpert BS, Pulliam DA, Willey ES, Somes GW, Stapelton FB. Sodium excretion and racial differences in ambulatory blood pressure patterns. *Hypertension* 1991;**18**:813–18.
- <sup>86</sup> Brion M-J, Ness AR, Davey Smith G *et al.* Sodium intake in infancy and blood pressure at 7 years: Findings from the Avon Longitudinal Study of Parents and Children. *Eur J Clin Nutr* 2008;**62**:1162–69.
- <sup>87</sup> Gillman MW, Oliveria SA, Moore LL, Ellison RC. Inverse association of dietary calcium with systolic blood pressure in young children. *J Am Med Assoc* 1992;**267**:2340–43.
- <sup>88</sup> Hamulka J, Gronowska-Senger A. Ocena sposobu Zywienia uczniow. *Zywnienie czlowieka i metabolism* 2000; 176–81.
- <sup>89</sup> Geleijnse JM, Hofman A, Witteman JC, Hazebroek AA, Valkenburg HA, Grobbee DE. Long-term effects of neonatal sodium restriction on blood pressure. *Hypertension* 1997;**29**:913–17.
- <sup>90</sup> Hassapidou M, Kafatos A, Manoukas G. Dietary vitamin E intake and plasma tocopherol levels of a group of adolescents from Spili, Crete. *Int J Food Sci Nutr* 1996;**47**:365–68.
- <sup>91</sup> Bergstrom E, Hernell O, Persson LA. Dietary changes in Swedish adolescents. *Acta Paediatr* 1993;**82**:472–80.
- <sup>92</sup> Samuelson G, Bratteby LE, Enghardt H, Hedgren M. Food habits and energy and nutrient intake in Swedish adolescents approaching the year 2000. *Acta Paediatr Suppl* 1996;**415**:1–19.
- <sup>93</sup> Ellison RC, Sosenko JM, Harper GP, Gibbons L, Pratter FE, Miettinen OS. Obesity, sodium intake, and blood pressure in adolescents. *Hypertension* 1980;**2**:78–82.
- <sup>94</sup> Gilliland FD, Berhane KT, Li YF, Kim DH, Margolis HG. Dietary magnesium, potassium, sodium, and children's lung function. *Am J Epidemiol* 2002;**155**:125–31.
- <sup>95</sup> Agostoni C, Garofalo R, Galluzzo C *et al.* Studio delle abitudini alimentari in una popolazione scolastica di un comune della provincia di Milano. *Riv Pediatr Prev Soc* 1998;**38**:59–65.
- <sup>96</sup> Watson RL, Langford HG, Abernethy J, Barnes TY, Watson MJ. Urinary electrolytes, body weight, and blood pressure. Pooled cross-sectional results among four groups of adolescent females. *Hypertension* 1980;**2**:93–98.
- <sup>97</sup> Simon JA, Obarzanek E, Daniels SR, Frederick MM. Dietary cation intake and blood pressure in black girls and white girls. *Am J Epidemiol* 1994;**139**:130–40.
- <sup>98</sup> Lytle LA, Himes JH, Feldman H *et al.* Nutrient intake over time in a multi-ethnic sample of youth. *Public Health Nutr* 2002;**5**:319–28.
- <sup>99</sup> Scientific Advisory Committee on Nutrition. Salt and Health. London: HMSO, 2003.
- <sup>100</sup> Holland B, Welch AA, Unwin ID, Buss DH, Paul AA, Southgate DAT. *McCance and Widdowson's The Composition of Foods*. Cambridge: Richard Clay Ltd, 1991.
- <sup>101</sup> Zhai FY, Yang XG. Report of National Nutrition and Health Survey of China Residents in 2002. Part 2: diet and nutrition intake (in Chinese). Beijing: People's Health Press, 2006.
- <sup>102</sup> Anderson CAM, Appel LJ, Okuda N, *et al.* Dietary sources of sodium in Japan, People's Republic of China, United Kingdom, and United States: The INTERMAP Study. 2009 (In press).
- <sup>103</sup> Why 6g? A summary of the scientific evidence for the salt intake target. Cambridge: MRC Human Nutrition Research Unit; 2005.
- <sup>104</sup> WHO/FAO. Diet, nutrition and the prevention of chronic diseases. Report of a joint WHO/FAO expert consultation. Technical Report Series 916. Geneva: World Health Organization, 2003.
- <sup>105</sup> Institute of Medicine. *Dietary Reference Intakes for Water, Potassium, Sodium, Chloride, and Sulphate*. Washington D.C.: National Academies Press, 2004.
- <sup>106</sup> MacGregor G, de Wardener HE. Commentary: salt, blood pressure and health. *Int J Epidemiol* 2002;**31**:320–27.
- <sup>107</sup> He FJ, Markandu ND, Sagnella GA, MacGregor GA. Effect of salt intake on renal excretion of water in humans. *Hypertension* 2001;**38**:317–20.
- <sup>108</sup> Puska P, Vartiainen E, Tuomilehto J, Salomaa V, Nissinen A. Changes in premature deaths in Finland: successful long-term prevention of cardiovascular diseases. *Bull World Health Organ* 1998;**76**:419–25.
- <sup>109</sup> Telegraph.co.uk. Ad of the week. Available at: <http://www.telegraph.co.uk/money/main.jhtml?xml=/money/2004/10/19/ccadh219.xml> (Accessed September 10, 2008).
- <sup>110</sup> Food Standards Agency. FSA – Salt – Industry activity. Available at: [http://www.salt.gov.uk/industry\\_activity.html](http://www.salt.gov.uk/industry_activity.html) (Accessed September 10, 2008).
- <sup>111</sup> Girgis S, Neal B, Prescott J *et al.* A one-quarter reduction in the salt content of bread can be made without detection. *Eur J Clin Nutr* 2003;**57**:616–20.
- <sup>112</sup> Lawes CMM, Vander Hoorn S, Law MR, Elliott P, MacMahon S, Rodgers A. Blood pressure and the global burden of disease 2000. Part I: estimates of blood pressure levels. *J Hypertens* 2006;**24**:413–22.
- <sup>113</sup> Lawes CMM, Vander Hoorn S, Law MR, Elliott P, MacMahon S, Rodgers A. Blood pressure and the global burden of disease 2000. Part II: estimates of attributable burden. *J Hypertens* 2006;**24**:423–30.
- <sup>114</sup> He FJ, MacGregor GA. How far should salt intake be reduced? *Hypertension* 2003;**42**:1093–99.
- <sup>115</sup> Neal B. The effectiveness and costs of population interventions to reduce salt consumption. Background paper prepared for the WHO Forum and Technical Meeting on Reducing Salt Intake in Populations, 5–7 October 2006. Paris, France. Geneva, Switzerland: World Health Organization, 2007.
- <sup>116</sup> Yusuf S, Reddy S, Ôunpuu S, Anand S. Global burden of cardiovascular diseases: Part I: general considerations, the epidemiologic transition, risk factors, and impact of urbanization. *Circulation* 2001;**104**:2746–53.
- <sup>117</sup> Yusuf S, Reddy S, Ôunpuu S, Anand S. Global burden of cardiovascular diseases: Part II: variations in cardiovascular disease by specific ethnic groups and geographic regions and prevention strategies. *Circulation* 2001;**104**:2855–64.
- <sup>118</sup> He FJ, Marrero NM, MacGregor GA. Salt intake is related to soft drink consumption in children and adolescents. *Hypertension* 2008;**51**:629–34.



- <sup>119</sup> Ludwig DS, Peterson KE, Gortmaker SL. Relation between consumption of sugar-sweetened drinks and childhood obesity: a prospective, observational analysis. *Lancet* 2001;**357**:505–8.
- <sup>120</sup> Mozaffarian D, Wilson PWF, Kannel WB. Beyond established and novel risk factors: lifestyle risk factors for cardiovascular disease. *Circulation* 2008;**117**:3031–38.
- <sup>121</sup> Chive SE, McCullough ML, Sacks FM, Rimm EB. Healthy lifestyle factors in the primary prevention of coronary heart disease among men: benefits among users and nonusers of lipid-lowering and antihypertensive medications. *Circulation* 2006;**114**:160–67.
- <sup>122</sup> Stamler R, Stamler J, Grimm R *et al.* Nutritional therapy for high blood pressure. Final report of a four-year randomized controlled trial – The Hypertension Control Program. *J Am Med Assoc* 1987;**257**:1484–91.
- <sup>123</sup> Neaton JD, Grimm RH Jr., Prineas RJ *et al.* Treatment of Mild Hypertension Study. Final results. *J Am Med Assoc* 1993;**270**:713–24.
- <sup>124</sup> Whelton PK, Appel LJ, Espeland MA *et al.* Sodium reduction and weight loss in the treatment of hypertension in older persons. A randomized controlled trial of nonpharmacologic interventions in the elderly (TONE). *J Am Med Assoc* 1998;**279**:839–46.
- <sup>125</sup> Beard TC, Blizzard L, O'Brien DJ, Dwyer T. Association between blood pressure and dietary factors in the dietary and nutritional survey of British adults. *Arch Intern Med* 1997;**157**:234–38.
- <sup>126</sup> Moraes RS, Fuchs FD, Dalla CF, Moreira LB. Familial predisposition to hypertension and the association between urinary sodium excretion and blood pressure in a population-based sample of young adults. *Braz J Med Biol Res* 2000;**33**:799–803.
- <sup>127</sup> Bisi Molina MdC, Cunha RdS, Herkenhoff LF, Mill JG. Hypertension and salt intake in an urban population. *Rev Saude Publica* 2003;**37**:743–50.
- <sup>128</sup> du Cailar G, Mimran A, Fesler P, Ribstein J, Blacher J, Safar ME. Dietary sodium and pulse pressure in normotensive and essential hypertensive subjects. *J Hypertens* 2004;**22**:697–703.
- <sup>129</sup> Liu L, Mizushima S, Ikeda K *et al.* Comparative studies of diet-related factors and blood pressure among Chinese and Japanese: results from the China-Japan Cooperative Research of the WHO-CARDIAC Study. Cardiovascular Disease and Alimentary Comparison. *Hyperten Res Clin Exp* 2000;**23**:413–20.
- <sup>130</sup> Kawamura M, Kimura Y, Takahashi K *et al.* Relation of urinary sodium excretion to blood pressure, glucose metabolism, and lipid metabolism in residents of an area of Japan with high sodium intake. *Hyperten Res Clin Exp* 1997;**20**:287–93.
- <sup>131</sup> Geleijnse JM, Witteman JC, Hofman A, Grobbee DE. Electrolytes are associated with blood pressure at old age: The Rotterdam Study. *J Hum Hypertens* 1997;**11**:421–23.
- <sup>132</sup> Kaufman JS, Owoaje EE, James SA, Rotimi CN, Cooper RS. Determinants of hypertension in West Africa: contribution of anthropometric and dietary factors to urban-rural and socioeconomic gradients. *Am J Epidemiol* 1996;**143**:1203–18.
- <sup>133</sup> Liu L, Ikeda K, Yamori Y, WHO-CARDIAC Study Group. Inverse relationship between urinary markers of animal protein intake and blood pressure in Chinese: results from the WHO Cardiovascular Diseases and Alimentary Comparison (CARDIAC) Study. *Int J Epidemiol* 2002;**31**:227–33.
- <sup>134</sup> Woo J, Leung SS, Ho SC, Lam TH, Janus ED. Dietary intake and practices in the Hong Kong Chinese population. *J Epidemiol Community Health* 1998;**52**:631–37.
- <sup>135</sup> Charlton KE, Steyn K, Levitt NS *et al.* Diet and blood pressure in South Africa: intake of foods containing sodium, potassium, calcium, and magnesium in three ethnic groups. *Nutrition* 2005;**21**:39–50.
- <sup>136</sup> Henderson L, Irving K, Gregory J *et al.* National Diet and Nutrition Survey: adults aged 19 to 64 Years. Vitamin and Mineral Intake and Urinary Analytes. Vol. 3. London: HMSO, 2003.
- <sup>137</sup> Wright JD, Wang C-Y, Kennedy-Stephenson J, Ervin RB. Dietary intake of ten key nutrients for public health. *Adv Data Vital Health Stat* 2003;**334**:1–4.
- <sup>138</sup> Jenner DA, English DR, Vandongen R *et al.* Diet and blood pressure in 9-year-old Australian children. *Am J Clin Nutr* 1988;**47**:1052–59.
- <sup>139</sup> Hoppe C, Molgaard C, Michaelsen KF. Bone size and bone mass in 10-year-old Danish children: effect of current diet. *Osteoporos Int* 2000;**11**:1024–30.
- <sup>140</sup> Heino T, Kallio K, Jokinen E *et al.* Sodium intake of 1 to 5-year-old children: the STRIP project. The Special Turku Coronary Risk Factor Intervention Project. *Acta Paediatr* 2000;**89**:406–10.
- <sup>141</sup> Rasanen M, Niinikoski H, Keskinen S *et al.* Nutrition knowledge and food intake of seven-year-old children in an atherosclerosis prevention project with onset in infancy: the impact of child-targeted nutrition counseling given to the parents. *Eur J Clin Nutr* 2001;**55**:260–67.
- <sup>142</sup> Deutsche Gesellschaft für Ernährung eV. Ernährungsbericht 2000. Frankfurt am Main: Deutsche Gesellschaft für Ernährung eV; 2000.
- <sup>143</sup> Remer T, Fonteyn N, Alexy U, Berkemeyer S. Longitudinal examination of 24-h urinary iodine excretion in schoolchildren as a sensitive, hydration status-independent research tool for studying iodine status. *Am J Clin Nutr* 2006;**83**:639–46.
- <sup>144</sup> Joshi S, Gupta S, Tank S, Malik S, Salgaonkar DS. Essential hypertension: Antecedents in children. *Indian Pediatr* 2003;**40**:24–29.
- <sup>145</sup> Yamauchi T, Furuta M, Hamada J, Kondo T, Sakakibara H, Miyao M. Dietary salt intake and blood pressure among schoolchildren. *Ann Physiol Anthropol* 1994;**13**:329–36.
- <sup>146</sup> Schreuder MF, Bokenkamp A, van Wijk JA. Salt intake in children: increasing concerns? *Hypertension* 2007;**49**:e10.
- <sup>147</sup> Zhu KM, He SP, Pan XQ, Zheng XR, Gu YA. The relation of urinary cations to blood pressure in boys aged seven to eight years. *Am J Epidemiol* 1987;**126**:658–63.
- <sup>148</sup> Gregory JR, Collins DL, Davies PSW, Hughes JM, Clarke PC. National Diet and Nutrition Survey: children aged 1.5 to 4.5 years. Vol. 1, Report of the Diet and Nutrition Survey. London: HMSO, 1995.
- <sup>149</sup> Nicklas TA. Dietary studies of children: The Bogalusa Heart Study experience. *J Am Diet Assoc* 1995;**95**:1127–33.
- <sup>150</sup> Faust HS. Effects of drinking water and total sodium intake on blood pressure. *Am J Clin Nutr* 1982;**35**:1459–67.

- <sup>151</sup> Cooper R, Liu K, Trevisan M, Miller W, Stamler J. Urinary sodium excretion and blood pressure in children: absence of a reproducible association. *Hypertension* 1983;**5**:135–39.
- <sup>152</sup> Connor SL, Connor WE, Henry H, Sexton G, Keenan EJ. The effects of familial relationships, age, body weight, and diet on blood pressure and the 24 hour urinary excretion of sodium, potassium, and creatinine in men, women, and children of randomly selected families. *Circulation* 1984;**70**:76–85.
- <sup>153</sup> Witschi JC, Capper AL, Hosmer DW Jr., Ellison RC. Sources of sodium, potassium, and energy in the diets of adolescents. *J Am Diet Assoc* 1987;**87**:1651–55.
- <sup>154</sup> Sanjur D, Garcia A, Aguilar R, Furumoto R, Mort M. Dietary patterns and nutrient intakes of toddlers from low-income families in Denver, Colorado. *J Am Diet Assoc* 1990;**90**:823–29.
- <sup>155</sup> Zive MM, Berry CC, Sallis JF, Frank GC, Nader PR. Tracking dietary intake in white and Mexican-American children from age 4 to 12 years. *J Am Diet Assoc* 2002;**102**:683–89.
- <sup>156</sup> Heird WC, Ziegler P, Reidy K, Briefel R. Current electrolyte intakes of infants and toddlers. *J Am Diet Assoc* 2006;**106** (Suppl 1):S43–S51.
